# Supplementary material
Source: HighWire-hosted journal article supplement (http://pharmrev.aspetjournals.org/highwire/filestream/21965/field_highwire_adjunct_files/0/15354SupplData.pdf)

## Supplemental Figures, Tables and Data

### *Methods*

#### *Human RGS protein sequence references (UniProt IDs)*

For data shown in Figures and Tables, the following human RGS protein exome sequences were analyzed and presented. The UniProt IDs for each of these are: RGS1: Q08116-1; RGS2: P41220-1; RGS3: P49796-3; RGS4: P49798-3 (longest RGS4-3) and P49798-1 (canonical RGS4-1); RGS5: O15539-3; RGS6: P49758-3; RGS7: P49802-1; RGS8: P57771-2; RGS9: O75916-1; RGS10: O43665-3 (longest RGS10-3) and O43665-1 (canonical RGS10-1); RGS11: O94810-1; RGS12: O14924-1; RGS13: O14921-1; RGS14: O43566-7; RGS16: O15492-1; RGS17: Q9UGC6-1; RGS18: Q9NS28-1; RGS19: P49795-1; RGS20: O76081-1; RGS21: Q2M5E4-1.

#### *Immunoaffinity capture of the RGS4:Gαi1 complex from cells*

HEK293 cells were transfected with Venus-RGS4 (WT or R134W) and Gαi1-Luciferase. Cells were washed with ice cold PBS, and then lysed with  $\text{AlF}_4^-$  lysis buffer (50mM Tris, 150mM NaCl, 1mM EDTA, 2mM DTT, 5mM  $\text{MgCl}_2$ , 1% Triton X-100, protease inhibitors, 10mM NaF, 9mM  $\text{MgCl}_2$ , 30 $\mu\text{M}$   $\text{AlCl}_3$ ). Cells rotated end-over-end for 1.5 hours at 4°C. Samples were then centrifuged for 10 minutes at 13,000 RPM at 4°C, and 30 $\mu\text{L}$  of cell lysate was collected for input. Protein G sepharose (GE Healthcare) (50 $\mu\text{L}$ ) was washed 3x with 1mL of ice cold PBS, and then incubated for an hour with 3% BSA (bovine serum albumin) rotating at 4°C. Beads were spun down, 3% BSA was removed, and lysates were added to beads with 2 $\mu\text{L}$  anti-GFP (MBL) to rotate for 1.5 hours at 4°C. Beads were then centrifuged for 30 seconds at 3000 RPM at 4°C, washed 4x with 1mL of ice cold wash buffer (0.1% Tween-20 in 1x PBS with  $\text{AlF}_4^-$ ), and boiled in Laemmli buffer for 5 minutes. 13% SDS-PAGE separated samples and nitrocellulose membranes were blotted with anti-Renilla Luciferase (Millipore, 1:1000) and anti-GFP (MBL, 1:1000). Secondary antibodies used were goat anti-mouse (1:5000) and goat anti-rabbit (1:25000), respectively.

### ***Bioluminescence Resonance Energy Transfer (BRET)***

For variant and wild type RGS4, we generated RGS4-Luciferase (RGS4-Luc) fusion constructs, a tag suitable for bioluminescence resonance energy transmission (BRET) which emits light at 485nm in the presence of 5  $\mu$ M coelenterazine H (CTZ) (Brown et al., 2015a). In combination with a YFP-tagged G $\alpha$ 1 (G $\alpha$ -YFP), RGS4-Luc will transfer energy to G $\alpha$ -YFP upon binding, thereby producing a 535nm emission BRET signal. We incubated AIF4- with cells expressing RGS4-Luc and G $\alpha$ -YFP to mimic the transition state of G $\alpha$  and recruit RGS4 binding for 30 minutes and then recorded emissions at 485nm and 535nm following CTZ activation. Net BRET was calculated by dividing the emission at 535nm by the emission at 485nm, and then subtracting background signal of 485nm alone.

### ***Missense Tolerance Ratio***

We calculated missense tolerance ratio as recently described (Traynelis et al., 2017). Briefly, we used a 31-codon sliding window using the following calculation:

$$MTR = \frac{\sum[missense_{obs}] / \sum[missense_{obs} + synonymous_{obs}]}{\sum[missense_{expected}] / \sum[missense_{expected} + synonymous_{expected}]}$$

where observed variants (“obs”) were reported variants from the GnomAD database and expected variants were calculated from all possible codon variations.

### ***Post-Translational Modification Alignment Analysis***

PTM alignment analysis is based on the SAPH-ire model as described previously (Torres et al., 2016) but was restricted to report only PTM count as described below. All PTMs are experimentally verified and were retrieved from dbPTM and SysPTM (Huang et al., 2016b; Li et al., 2014). To account for the diverse domains observed across the different proteins of the RGS protein family, a domain specific analysis was performed for all domain families observed within the RGS superfamily. Seven domains seen across RGS proteins were analyzed, namely DEP: disheveled, EGL-10, pleckstrin homology domain; DHEX, DEP helical extension (IPR000591), GGL: G $\gamma$  subunit-like domain (IPR015898), GPR/GoLoco: G protein regulatory motif (IPR003109), PDZ: domain present in PSD-95, Dlg, and ZO-1/2 (IPR001478), PTB: phospho-tyrosine binding domain (IPR006020), RBD: Raf-like Ras binding domain (IPR003116), and

RGS domain (IPR016137; the focus of this review). The domain sequences for all RGS proteins belonging to each of these domain families were obtained from Interpro (Hunter et al., 2009). The multi-FASTA files generated for each domain family were subsequently aligned using MUSCLE using default parameters (Edgar, 2004). Modified Alignment Positions (MAPs), domain family alignment positions that harbor at least one experimentally verified PTM specific to human RGS proteins, were coalesced and the PTM count within each determined by the sum of human family members for which experimental PTM has been observed and curated in the public domain via dbPTM and Phosphosite Plus (Hornbeck et al., 2015; Huang et al., 2016b). PTMs outside the RGS domain and specific to each given RGS protein are reported as single observations though may, in many cases, coalesce into MAPs of other domain families (data not shown). Non-domain PTMs and RGS domain MAPs were related directly to mutation data based on UniProt ID and native position anchor sequences (Bairoch et al., 2005), and plotted with respect to the MTR value at each native position.

## SUPPLEMENTAL DATA

**Table S1. RGS protein variants that overlap with post-translational modifications (PTMs).** Post translational modifications that overlap with a human variant (GnomAD) for each RGS1-21 are listed. Grey boxes indicate the PTM/Mutation overlap is found within the canonical RGS domain. The type of modification, missense tolerance ratio (MTR), combined annotation dependent depletion (CADD) C-score, and population allele frequency (Prevalence) are listed. Allele frequency is listed in terms of the *most prevalent population*. If multiple populations have high prevalence, then prevalence is listed in terms of global allele frequency. Human variants are described according to GnomAD convention based on the longest splice variant for each human RGS protein, as opposed to the canonical (Uniprot-based) isoform. Thus, we include in parenthesis the canonical residue number in cases where they differ (RGS4, RGS5 and RGS10) from the longest splice variant position.

| <b>PTM/Mutation Overlap for All RGS Proteins</b> |                         |                 |             |                    |                       |
|--------------------------------------------------|-------------------------|-----------------|-------------|--------------------|-----------------------|
| <b>RGS</b>                                       | <b>Residue Mutation</b> | <b>PTM</b>      | <b>CADD</b> | <b>MTR</b>         | <b>Prevalence</b>     |
| <b>RGS1</b>                                      | K13E                    | Methylation     | 16.31       | 0.99               | 0.0065% (South Asian) |
|                                                  | S67Y                    | Phosphorylation | 22.7        | 0.92               | 0.0009% (European)    |
|                                                  | K164Q                   | Methylation     | 7.4         | 0.95               | 0.0032% (South Asian) |
| <b>RGS2</b>                                      | S46N                    | Phosphorylation | 22.5        | 0.70               | 0.0232% (East Asian)  |
|                                                  | S64G                    | Phosphorylation | 13.77       | 0.92               | 0.0009% (European)    |
|                                                  | Y116C                   | Phosphorylation | 25.5        | 0.92               | 0.0009% (European)    |
|                                                  | Y133C                   | Phosphorylation | 27          | 0.88               | 0.0009% (European)    |
|                                                  | Y178C                   | Phosphorylation | NA          | 0.90               | 0.0182% (Other)       |
| <b>RGS3</b>                                      | S395L                   | Phosphorylation | 29.3        | 0.97               | 0.0037% (Global)      |
|                                                  | T396I                   | Phosphorylation | 23.3        | 0.99               | 0.0033% (South Asian) |
|                                                  | R448H                   | Methylation     | 14.5        | 0.73               | 0.0210% (Other)       |
|                                                  | S496G                   | Phosphorylation | 14.3        | 1.09               | 0.0060% (Latino)      |
|                                                  | S496N                   | Phosphorylation | 12.11       | 1.09               | 0.0065% (African)     |
|                                                  | T536M                   | Phosphorylation | 23.9        | 0.67               | 0.0089% (Latino)      |
|                                                  | S662L                   | Phosphorylation | 27          | 0.63               | 0.0455% (South Asian) |
|                                                  | S777L                   | Phosphorylation | 18.2        | 0.81               | 0.0009% (European)    |
|                                                  | S806F                   | Phosphorylation | 19.4        | 0.82               | 0.0060% (Latino)      |
|                                                  | T808N                   | Phosphorylation | 15.6        | 0.84               | 0.1674% (Global)      |
|                                                  | S823F                   | Phosphorylation | 14.8        | 1.07               | 0.0018% (European)    |
|                                                  | T921M                   | Phosphorylation | 28.8        | 0.95               | 0.0390% (South Asian) |
|                                                  | S936L                   | Phosphorylation | 34          | 0.87               | 0.1046% (African)     |
|                                                  | T941M                   | Phosphorylation | 34          | 0.90               | 0.0033% (South Asian) |
|                                                  | S965L                   | Phosphorylation | 13.4        | 0.75               | 0.0033% (South Asian) |
| S992C                                            | Phosphorylation         | 25              | 1.16        | 0.0067% (European) |                       |
| S1007N                                           | Phosphorylation         | 22              | 0.88        | 0.0009% (European) |                       |
| <b>RGS4</b>                                      | C109(12)R               | Palmitoylation  | 24.9        | 0.60               | 0.0083% (African)     |
| <b>RGS5</b>                                      | Y73C                    | Phosphorylation | 17.8        | 0.88               | 0.0041% (South Asian) |
|                                                  | Y117C                   | Phosphorylation | 26.5        | 0.94               | 0.0167% (African)     |
|                                                  | S170 (166) P            | Phosphorylation | 32          | 1.13               | 0.0117% (East Asian)  |
| <b>RGS7</b>                                      | K251Q                   | Acetylation     | 24.5        | 0.93               | 0.0058% (East Asian)  |
|                                                  | S457L                   | Phosphorylation | 21.8        | 0.69               | 0.0058% (East Asian)  |

|       |            |                 |       |      |                       |
|-------|------------|-----------------|-------|------|-----------------------|
| RGS9  | Y153C      | Phosphorylation | 25.8  | 0.85 | 0.0155% (Other)       |
|       | Y153S      | Phosphorylation | 23.5  | 0.85 | 0.0030% (Latino)      |
|       | Y153D      | Phosphorylation | 23.4  | 0.85 | 0.0016% (European)    |
|       | S304R      | Phosphorylation | 3.7   | 0.72 | 0.0016% (European)    |
|       | Y413C      | Phosphorylation | 27.2  | 0.94 | 0.0032% (South Asian) |
|       | K419R      | Acetylation     | 17.12 | 0.93 | 0.0029% (Latino)      |
| RGS10 | S24(16)T   | Phosphorylation | 7.27  | 0.78 | 0.0030% (Latino)      |
|       | S27(19)N   | Phosphorylation | 21.9  | 0.81 | 0.0009% (European)    |
|       | K148(140)R | Ubiquitination  | 25    | 0.81 | 0.0009% (European)    |
|       | Y179(171)N | Phosphorylation | 28.5  | 1.1  | 0.0009% (European)    |
| RGS12 | S16L       | Phosphorylation | 11.27 | 0.91 | 0.0066% (African)     |
|       | S16A       | Phosphorylation | 0.001 | 0.91 | 13.0309% (African)    |
|       | S88P       | Phosphorylation | 23.1  | 0.93 | 0.0032% (South Asian) |
|       | S107G      | Phosphorylation | 24    | 1.00 | 0.0032% (South Asian) |
|       | S107C      | Phosphorylation | 23.8  | 1.00 | 0.0054% (European)    |
|       | S172L      | Phosphorylation | 26.8  | 0.99 | 0.0155% (Other)       |
|       | S195C      | Phosphorylation | 23.2  | 1.05 | 0.0009% (European)    |
|       | S284N      | Phosphorylation | 13.8  | 0.93 | 0.0009% (European)    |
|       | S483I      | Phosphorylation | 0.64  | 0.95 | 0.0010% (European)    |
|       | T492N      | Phosphorylation | 0.001 | 0.97 | 0.0028% (European)    |
|       | R633W      | Methylation     | 31    | 1.09 | 0.0032% (South Asian) |
|       | R633P      | Methylation     | 23.8  | 1.09 | 0.0167% (African)     |
|       | R633Q      | Methylation     | 23.5  | 1.09 | 8.5678% (South Asian) |
|       | R633L      | Methylation     | 21.1  | 1.09 | 0.0009% (European)    |
|       | R643C      | Methylation     | 29    | 1.03 | 0.0682% (South Asian) |
|       | R643S      | Methylation     | 27.8  | 1.03 | 0.0009% (European)    |
|       | R643H      | Methylation     | 26.4  | 1.03 | 0.0365% (Other)       |
|       | S649L      | Phosphorylation | 26.9  | 0.92 | 0.0065% (South Asian) |
|       | S649P      | Phosphorylation | 23.3  | 0.92 | 0.0032% (South Asian) |
|       | S649T      | Phosphorylation | 23.2  | 0.92 | 0.0030% (Latino)      |
|       | T676M      | Phosphorylation | 25    | 0.75 | 0.1193% (Latino)      |
|       | T866M      | Phosphorylation | 32    | 0.82 | 0.0054% (East Asian)  |
|       | S934L      | Phosphorylation | 30    | 0.78 | 0.0058% (East Asian)  |
|       | S947L      | Phosphorylation | 17.9  | 0.56 | 0.0104% (Ashkenazi)   |
|       | T1331M     | Phosphorylation | 21.6  | 0.67 | 0.0092% (Global)      |

|              |                 |                 |       |                    |                            |
|--------------|-----------------|-----------------|-------|--------------------|----------------------------|
| <b>RGS13</b> | Y146H           | Phosphorylation | 27.3  | 0.99               | 0.0535% (East Asian)       |
| <b>RGS14</b> | R27M            | Methylation     | 21.4  | 1.03               | 0.0191% (Other)            |
|              | K86N            | Ubiquitination  | 27.9  | 0.80               | 0.0009% (European)         |
|              | K86R            | Ubiquitination  | 23.5  | 0.80               | 0.0030% (Latino)           |
|              | S260F           | Phosphorylation | 32    | 0.97               | 0.0754% (East Asian)       |
|              | S288R           | Phosphorylation | 29.1  | 1.11               | 0.0009% (European)         |
|              | T292K           | Phosphorylation | 12.15 | 1.12               | 0.1166% (East Asian)       |
|              | T292M           | Phosphorylation | 13.01 | 1.12               | 0.0030% (Latino)           |
|              | T472A           | Phosphorylation | 0.371 | 1.08               | 0.2729% (South Asian)      |
|              | S480G           | Phosphorylation | 6.092 | 0.98               | 0.0067% (European)         |
|              | T490S           | Phosphorylation | 0.004 | 0.94               | 0.0060% (Latino)           |
|              | T490N           | Phosphorylation | 12.99 | 0.94               | 0.0162% (South Asian)      |
| S510G        | Phosphorylation | 23.4            | 1.06  | 0.0009% (European) |                            |
| <b>RGS16</b> | C12             | Palmitoylation  | 33    | 1.11               | 0.0115% (African)          |
|              | C98Y            | Palmitoylation  | 33    | 0.96               | 0.0047% (European)         |
| <b>RGS17</b> | Y171F           | Phosphorylation | 9.1   | 0.77               | 0.0067% (European)         |
| <b>RGS19</b> | Y146C           | Phosphorylation | 26.3  | 0.64               | 0.0009% (European)         |
|              | T186A           | Phosphorylation | 16.4  | 0.67               | 0.0009% (European)         |
|              | T201I           | Phosphorylation | 11.5  | 0.90               | 0.0511% (Ashkenazi Jewish) |
|              | S211L           | Phosphorylation | 22.8  | 1.06               | 0.0115% (African)          |
|              | S213A           | Phosphorylation | 0.11  | 1.07               | 0.0009% (European)         |
| <b>RGS20</b> | S77R            | Phosphorylation | 23.9  | 1.13               | 0.0119% (Latino)           |
|              | S77T            | Phosphorylation | 23    | 1.13               | 0.0072% (European)         |
|              | T162I           | Phosphorylation | 15.7  | 0.90               | 0.0067% (European)         |
|              | S166G           | Phosphorylation | 13.8  | 1.15               | 0.0067% (European)         |
| <b>RGS21</b> | Y116C           | Phosphorylation | 25.5  | 0.92               | 0.0009% (European)         |
|              | Y133C           | Phosphorylation | 27    | 0.88               | 0.0009% (European)         |

## Supplemental Figures

### RGS Domain – Family Comparison

|       |     |             |               |            |            |             |             |     |
|-------|-----|-------------|---------------|------------|------------|-------------|-------------|-----|
| RGS9  | 281 | -WDL-----   | NAKLVEIPTK    | MRVERWAFNF | SELIRDPKGR | QSFQYFLKKE  | FSGENLGFWE  | 333 |
| RGS17 | 56  | THTTKMESIQ  | VLEECQNPTA    | EEVLSWSQNF | DKMMKAPAGR | NLFREFLRTE  | YSEENLLFWL  | 115 |
| RGS4  | 34  | EHNSSHNKGD  | KVVICQRVSQ    | EEVKKWAESL | ENLISHECGL | AAFKAFLKSE  | YSEENIDFWI  | 93  |
| RGS10 | 7   | FADIH--DSD  | GSSSSSHQSL    | KSTAKWAASL | ENLLEDPEGV | KRFREFLKKE  | FSEENVLFWL  | 64  |
|       |     |             | . :           | . * : . :  | ... :      | * * :       | * * * : * * |     |
| RGS9  | 334 | ACEDLKY-GD  | QSKVKEKAE     | IYKLFLAPGA | RRWINIDGKT | MDITVKGLKH  | PHRYVLDAAQ  | 392 |
| RGS17 | 116 | ACEDLKKEQN  | KKVIEEKARM    | IYEDYISILS | PKEVSLDSRV | REVINRNLLD  | PNPHMYEDAQ  | 175 |
| RGS4  | 94  | SCEEYKKIKS  | PSKLSPKAKK    | IYNEFISVQA | TKEVNLDST  | REETS RNMLE | PTITCFDEAQ  | 153 |
| RGS10 | 65  | ACEDFKMQD   | KTQMQEKAKE    | IYMTFLSSKA | SSQVNVEGQS | RLN-EKILEE  | PHPLMFQKLQ  | 123 |
|       |     | : * * : *   | . . : . * .   | ** : : :   | : : : .    | : : . *     | : *         |     |
| RGS9  | 393 | THIYMLMKKD  | SYARYLKSPI    | YKDMLAKAIE | PQETTKKSST | LPFMRRHLRS  | SPSPVILRQL  | 452 |
| RGS17 | 176 | LQIYTLMHRD  | SFPRFLNSQI    | YKSPVESTAG | SSSES----- | -----       | -----       | 210 |
| RGS4  | 154 | KKIFNLMEKD  | SYRRFLKSRF    | YLDLVNPSSC | GAEKQKGAKS | SADCASLVPQ  | CA-----     | 205 |
| RGS10 | 124 | DQIFNLMKYD  | SYSRFLKSDL    | FLKHKRTEEE | EEDLPDA-QT | AAKRASRIYN  | T-----      | 173 |
|       |     | : * : * . * | * : * : * : * | : : .      | .          |             |             |     |

**Figure S1. Family alignment of RGS domains.** To identify conserved residues critical for  $G\alpha$  interaction, we used Clustal W to align each of the representative subfamily members (RGS4, RGS9, RGS10) with RGS17. We highlighted residues that were noted as important for binding (Figures 2, 4, 5) to compare against RGS17. From this information, we identified residues in RGS17 that are predicted contact points with  $G\alpha$ .

## Supplemental Raw Data Files

We include MTR plots with overlaid PTMs for the remaining RGS proteins that were not highlighted in the body of the text. We also include our comprehensive curated RGS PTM/Mutation database with all reported human variants for all canonical human RGS proteins from the GnomAD consortium (version 2.0). These are available as downloadable and expandable MS Excel Files (XLSX). We include only variants that were not filtered out by the Broad Institute to ensure quality source data. Human variants are described according to GnomAD convention based on the longest splice variant for each human RGS protein, as opposed to the canonical (UniProt-based) reference isoform. Thus, we include in parenthesis the canonical residue number in cases where they differ from the longest splice variant position.

**Figure S2. Analysis of rare variants and PTMs found within human RGS proteins.** Data is presented for all human RGS proteins that were not highlighted in the body of the text. Human variants correspond to GnomAD convention based on the longest splice variant for each human RGS protein (see Methods for UniProt IDs). **(For each RGS, TOP)** Rare human variants of RGS proteins are plotted along the protein sequence using Lollipops (<https://github.com/pbnjay/lollipops>). Missense (amino acid change) variants are displayed on top in teal, while silent (no amino acid change) variants are displayed on the bottom in purple. **(For each RGS, BOTTOM)** Missense Tolerance Ratio (MTR) and Post-Translational Modification (PTM) cluster analysis plot for each RGS (see text for details). If the RGS domain (highlighted in blue) or other protein region is under selective pressure, the MTR will fall below the median (red line). The location of functional or disease-linked post-translational modifications (PTMs) are plotted as colored circles on the line. The PTM identities and amino acid location, as well as the MTR data for each RGS are available in Table S1 and in the downloadable and expandable MS Excel Files (XLSX).



# RGS1

Missense

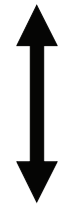

Silent

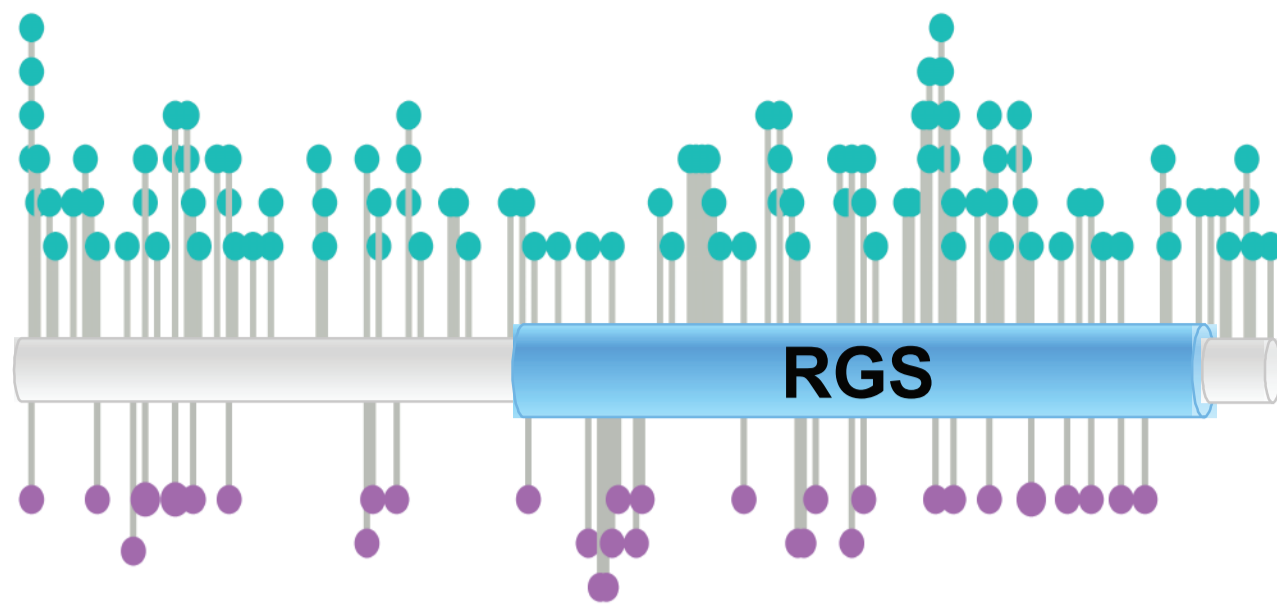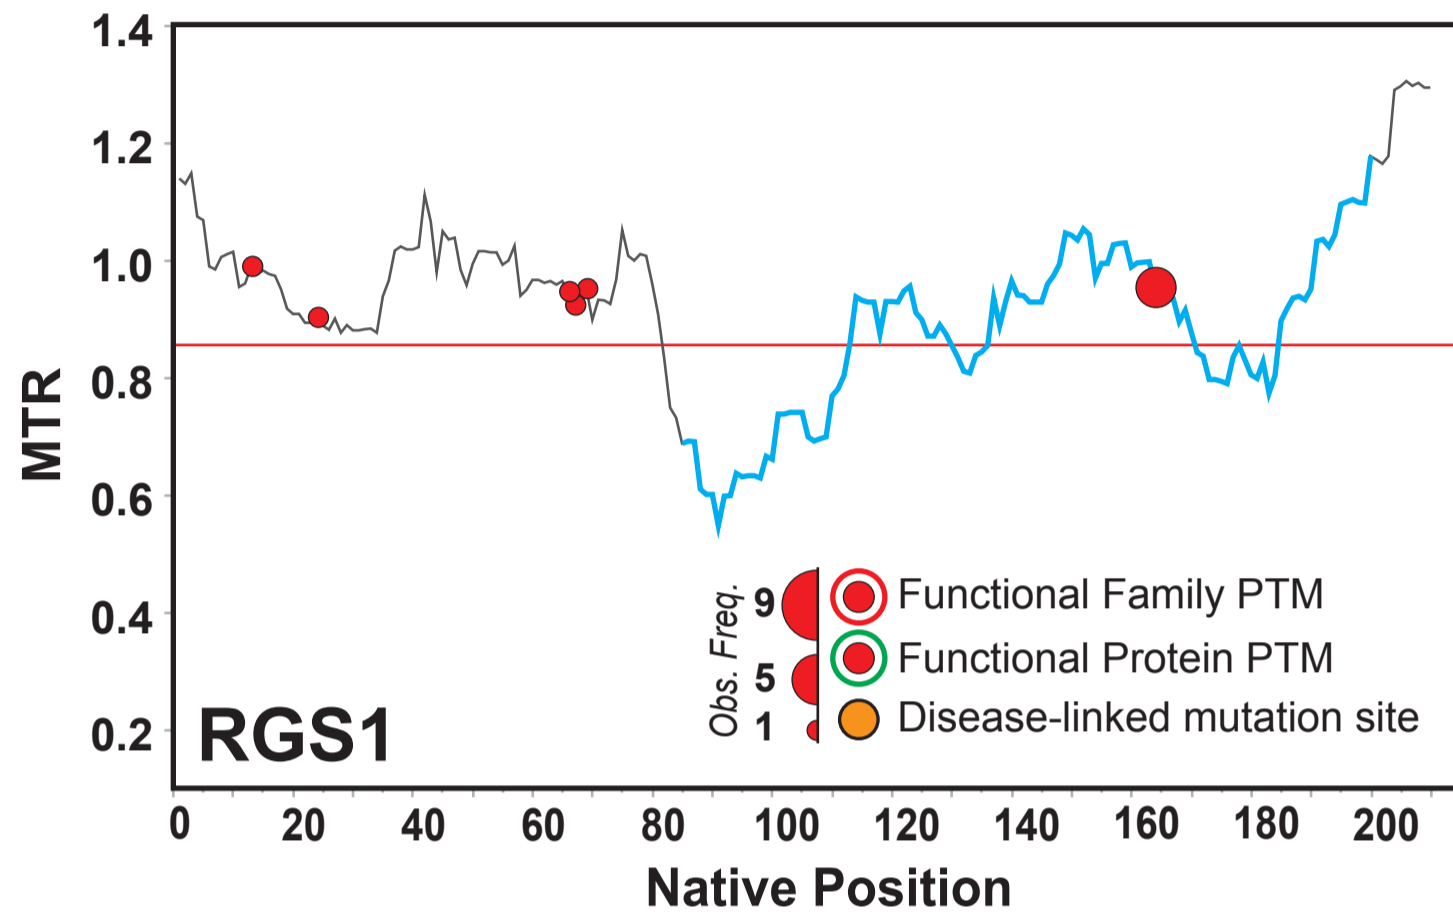

# RGS2

Missense

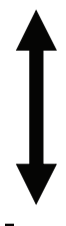

Silent

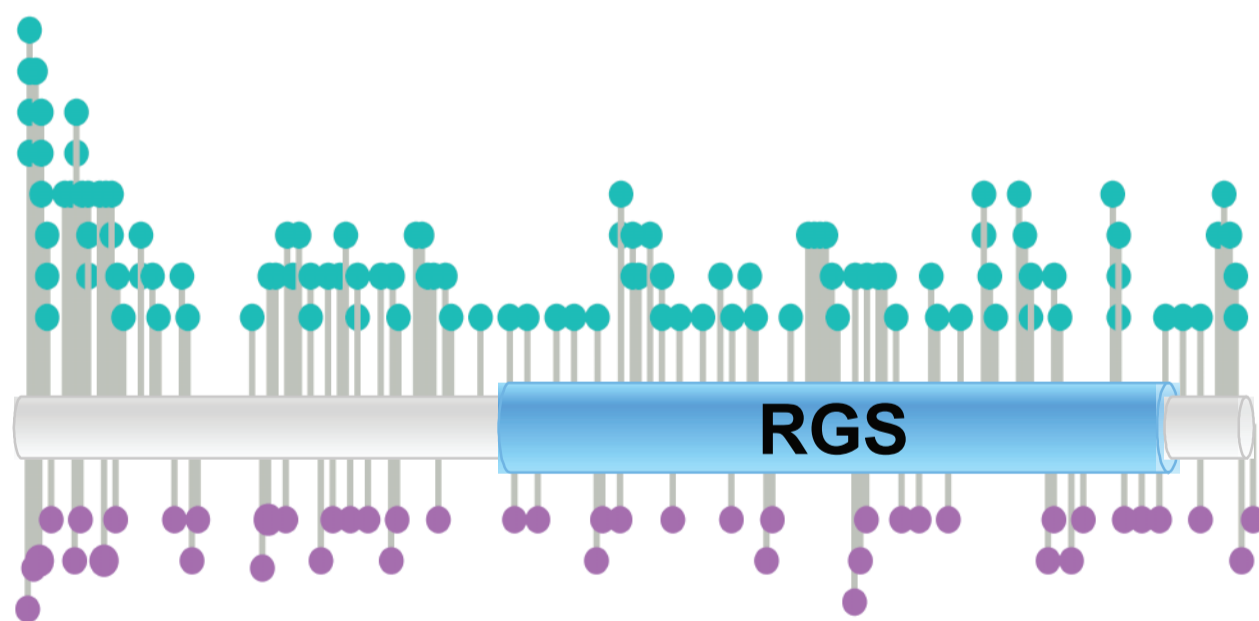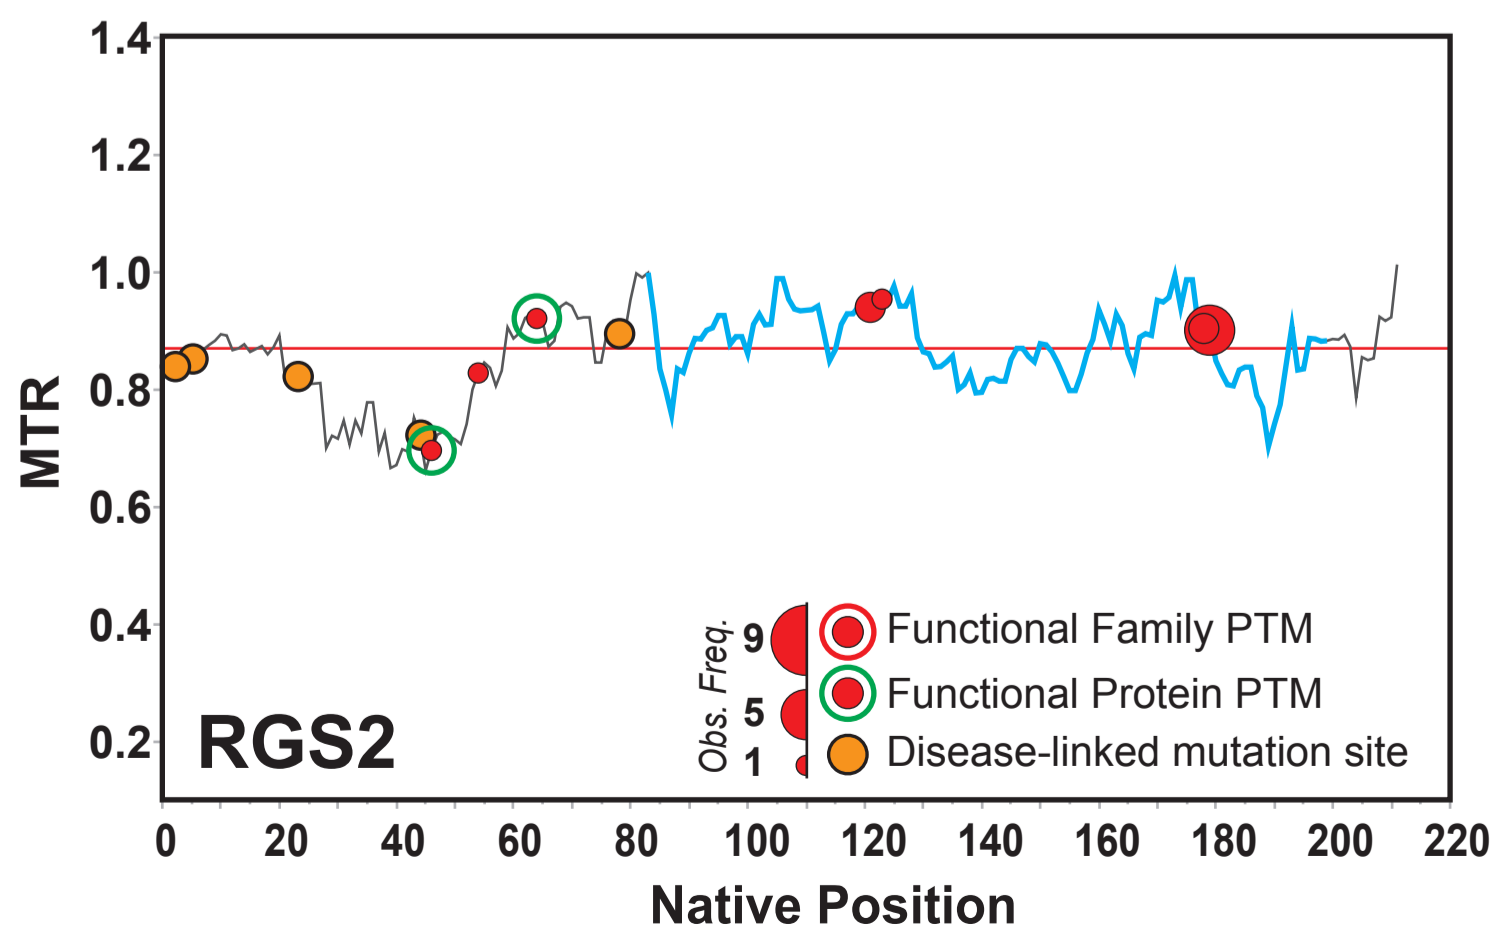

# RGS3

Missense

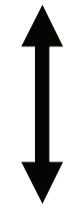

Silent

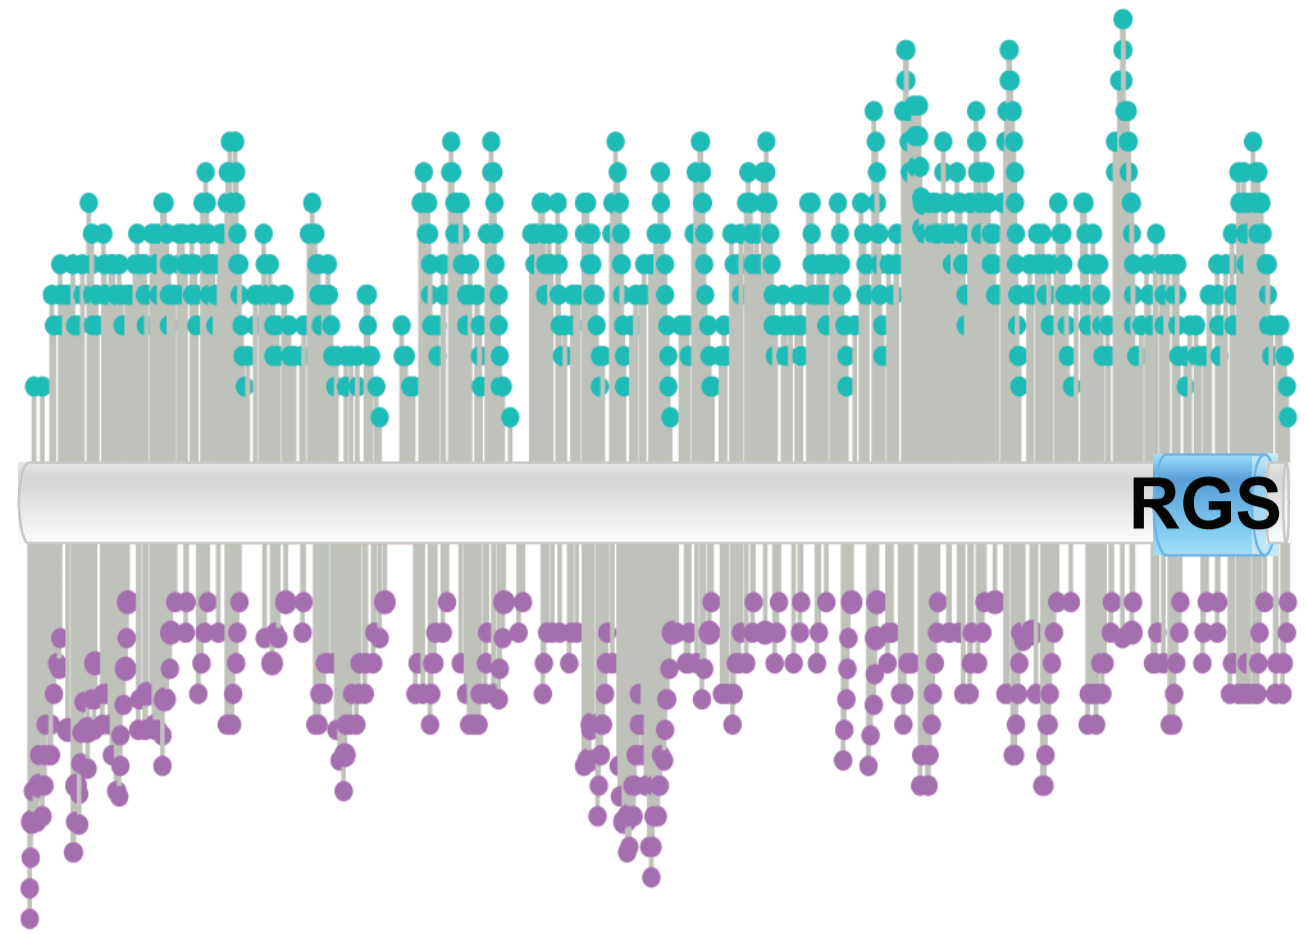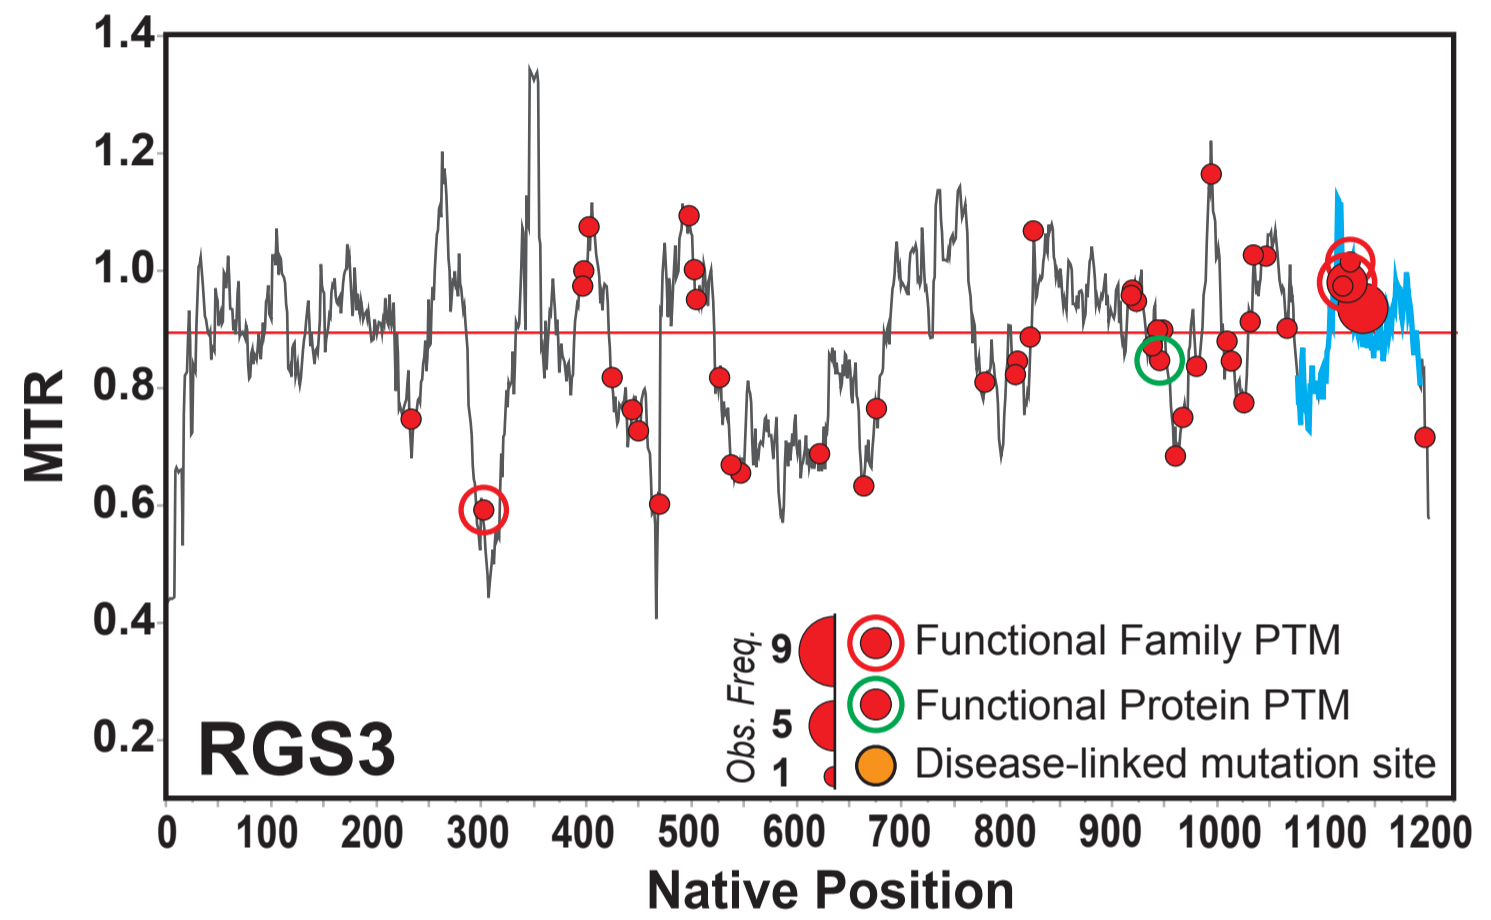

# RGS5

Missense

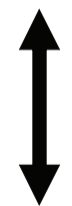

Silent

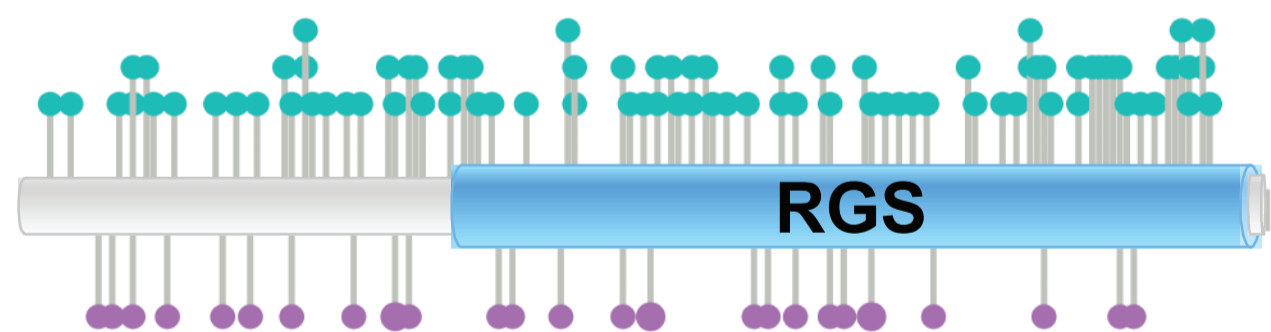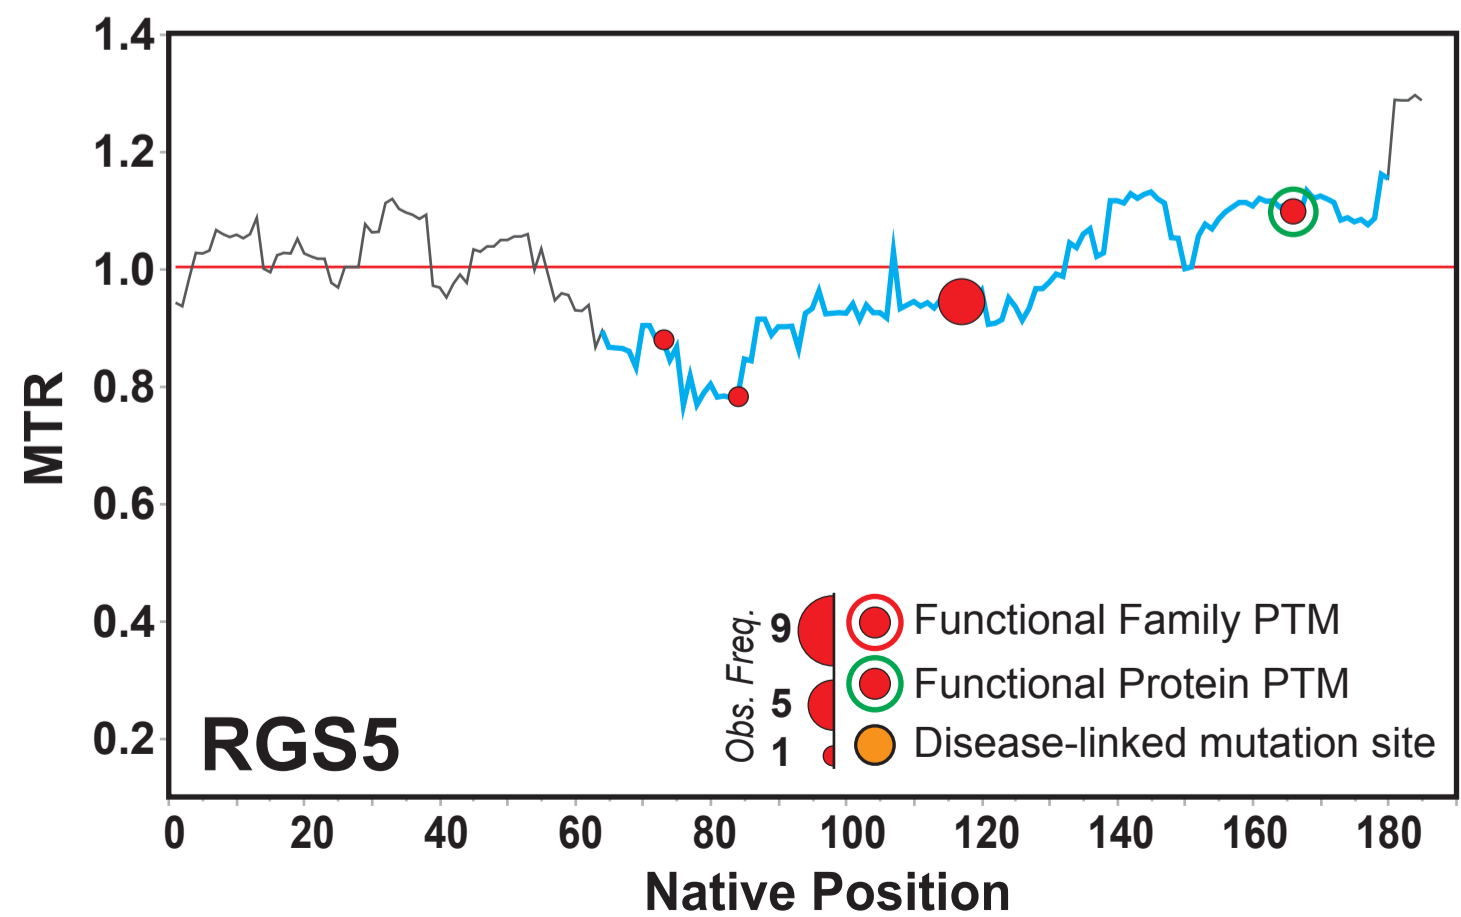

# RGS6

Missense

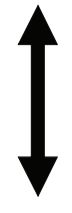

Silent

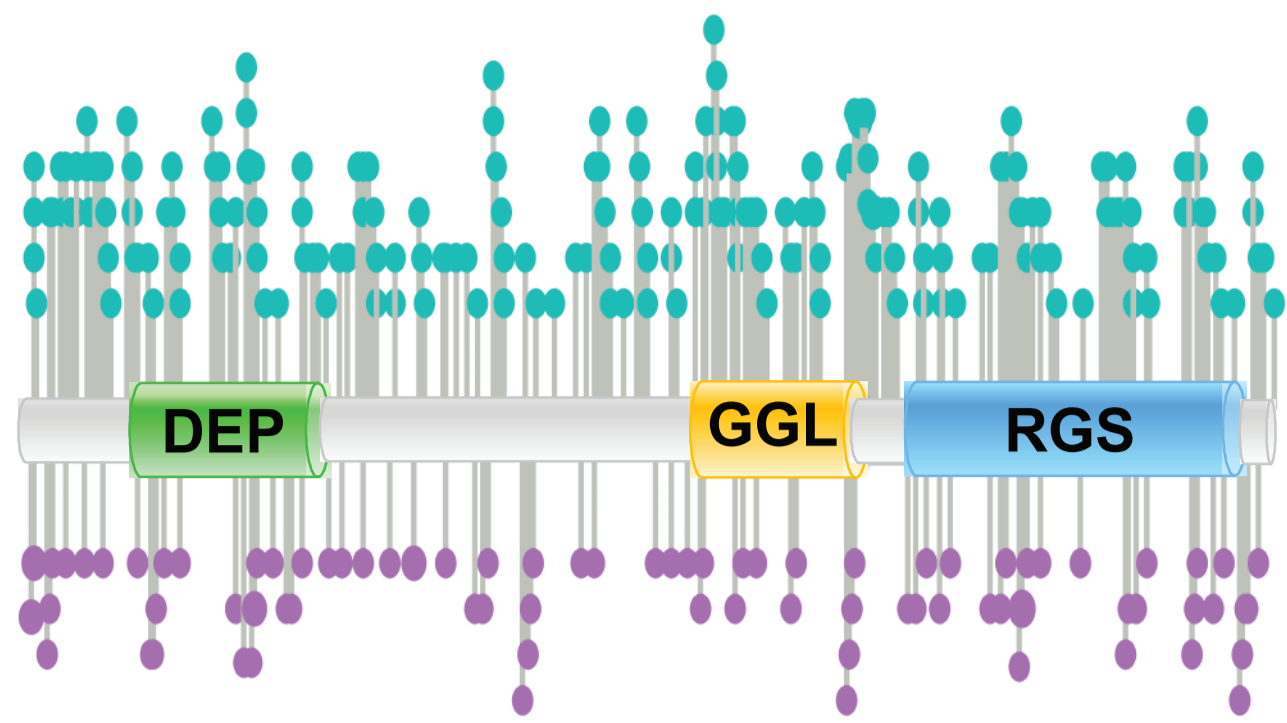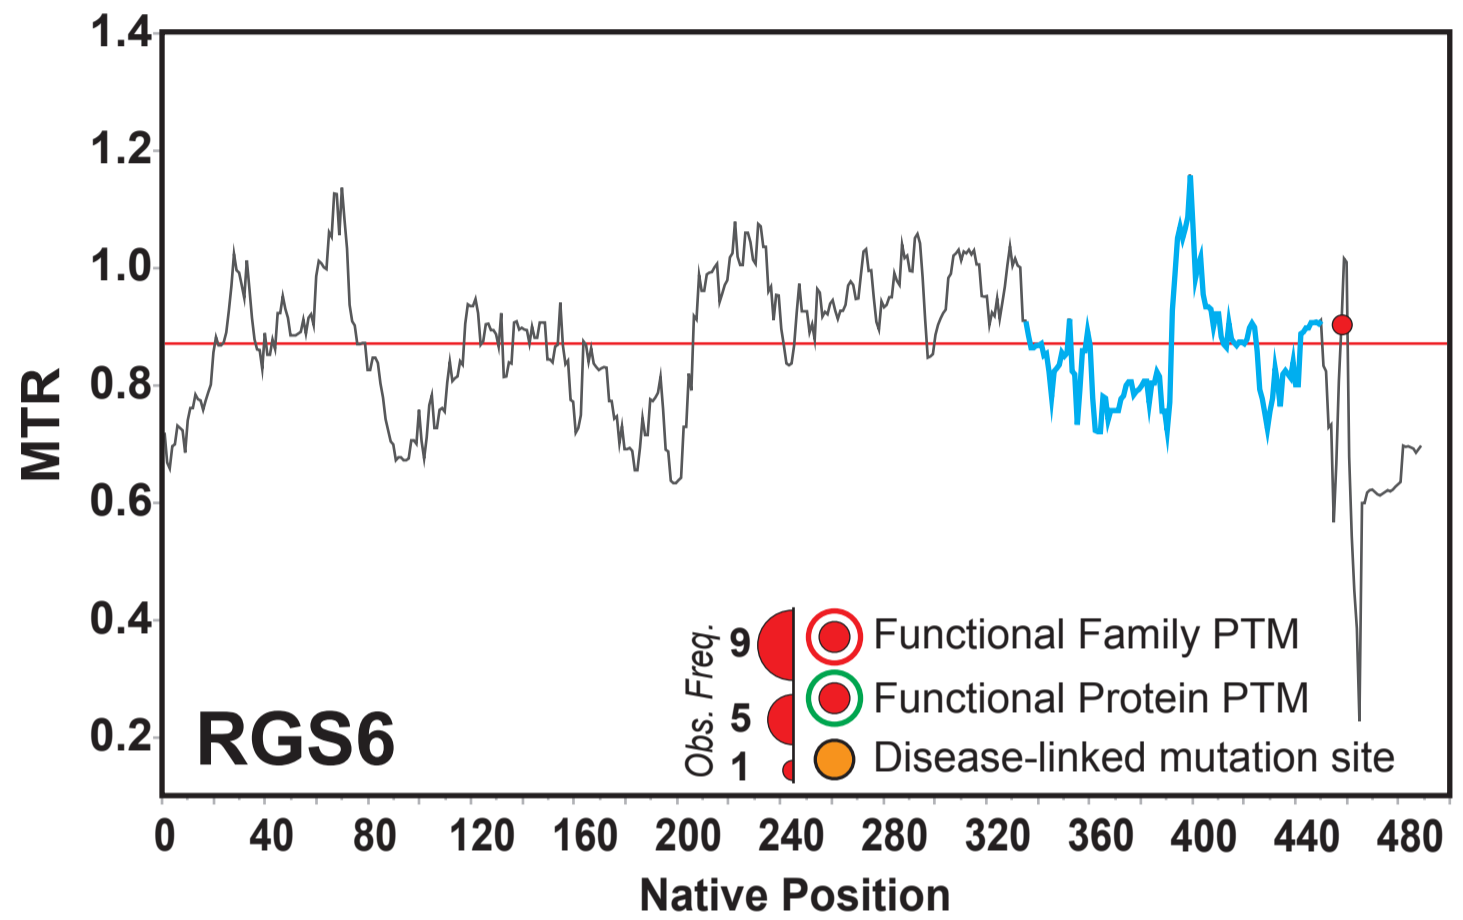

# RGS7

Missense

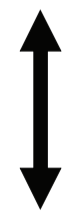

Silent

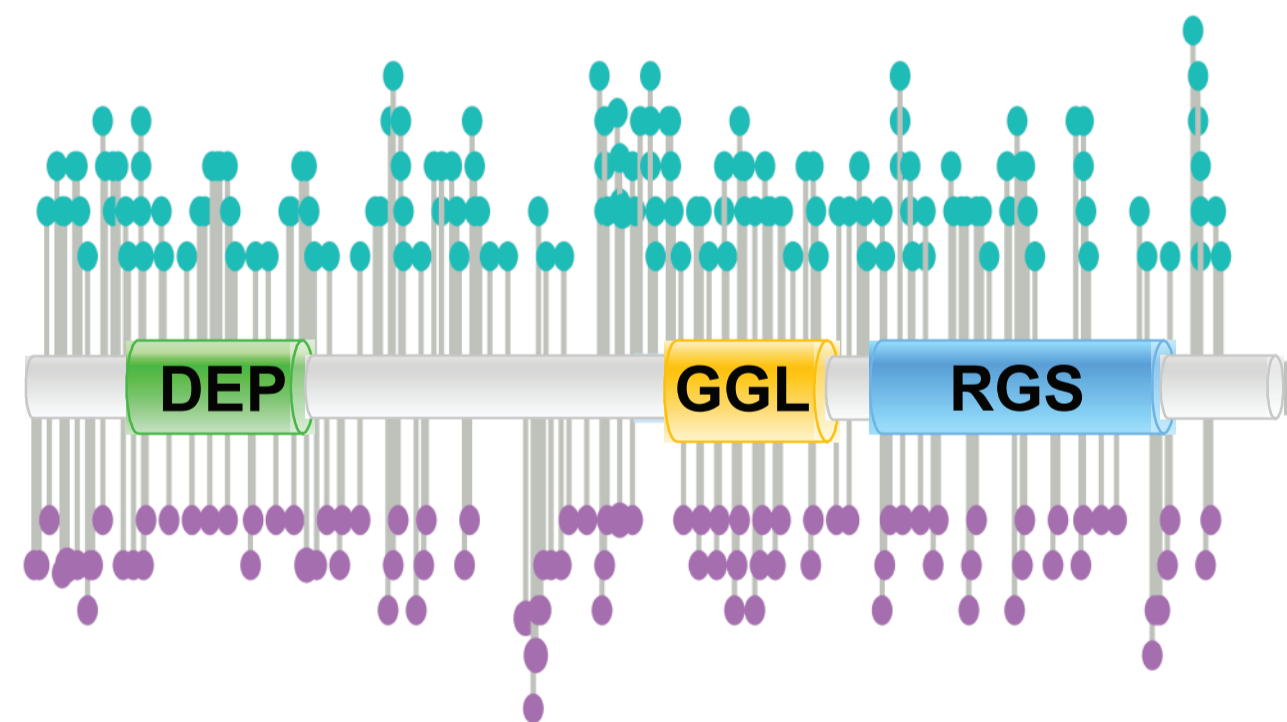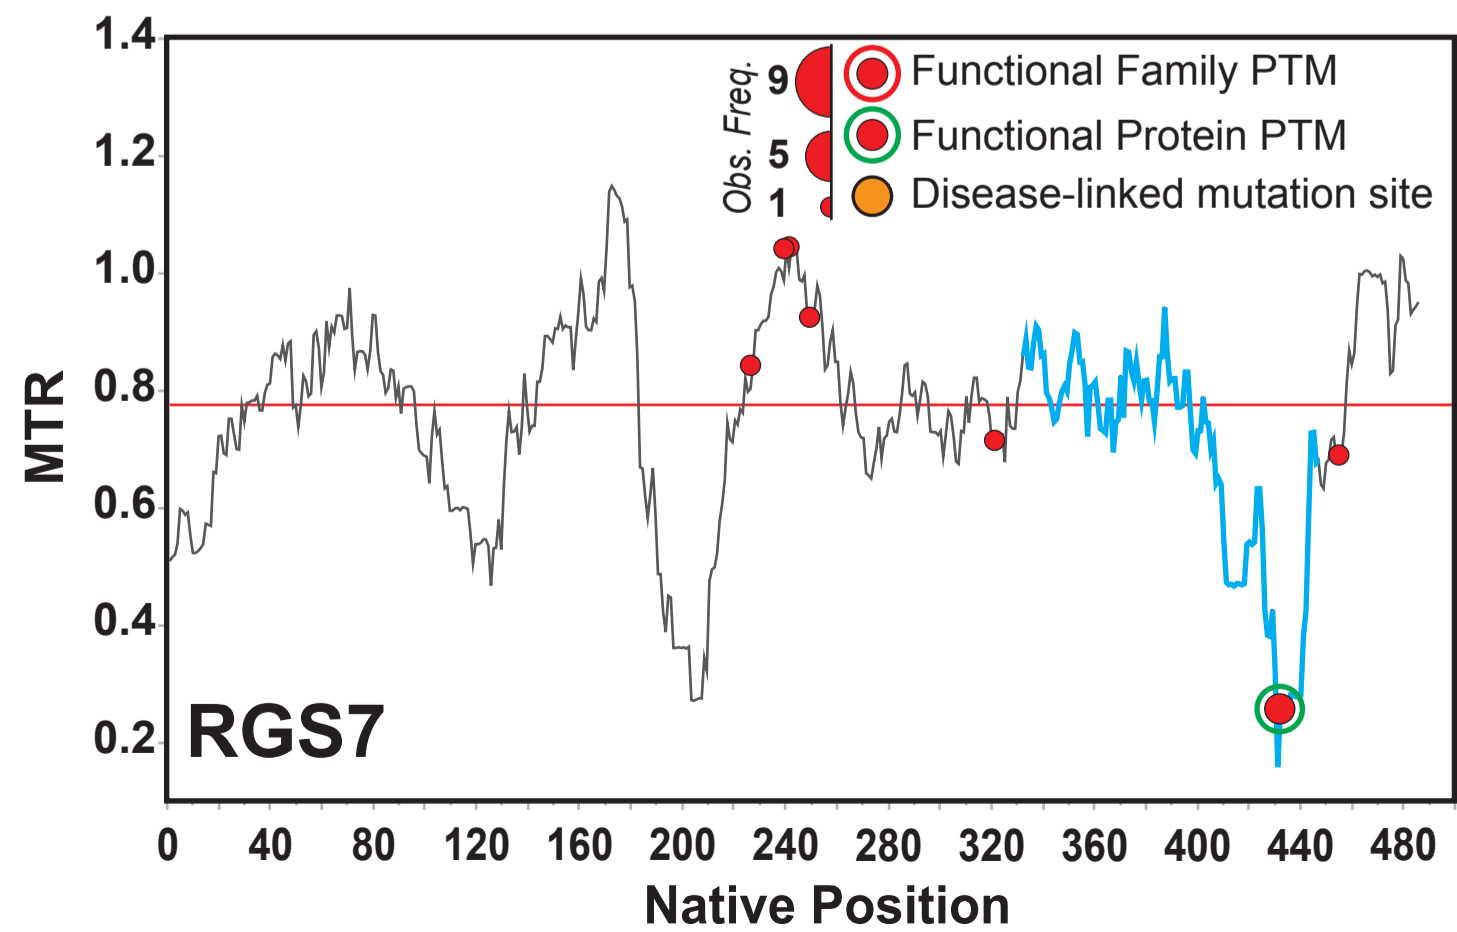

# RGS8

Missense

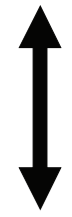

Silent

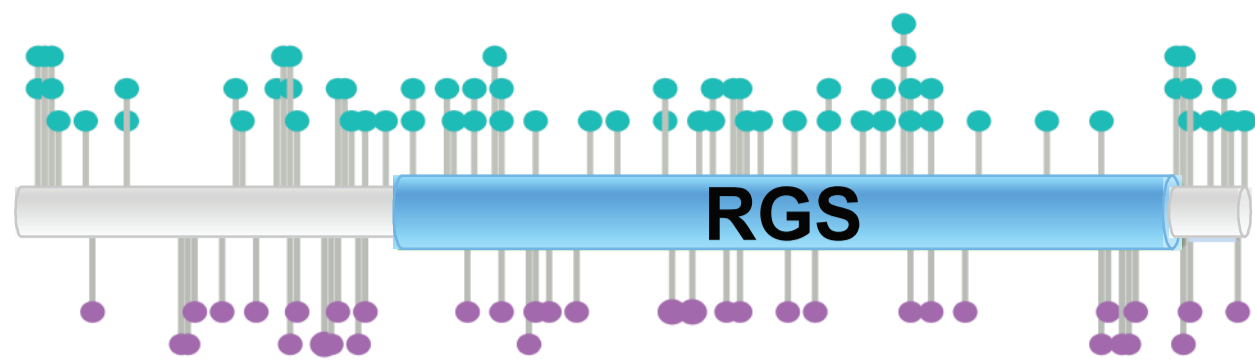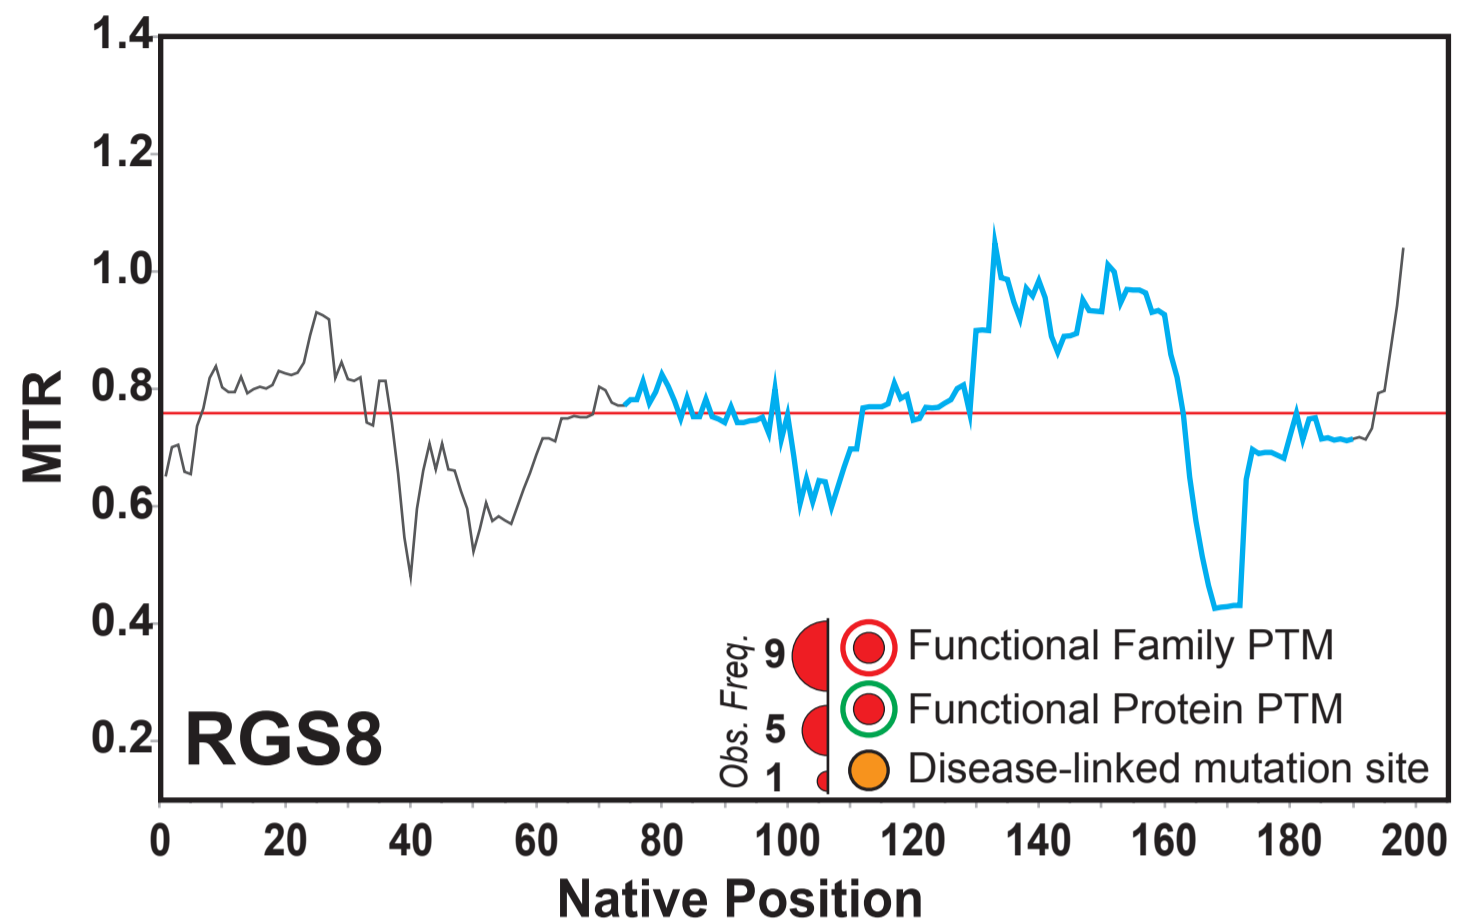

# RGS11

Missense

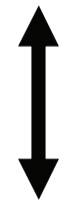

Silent

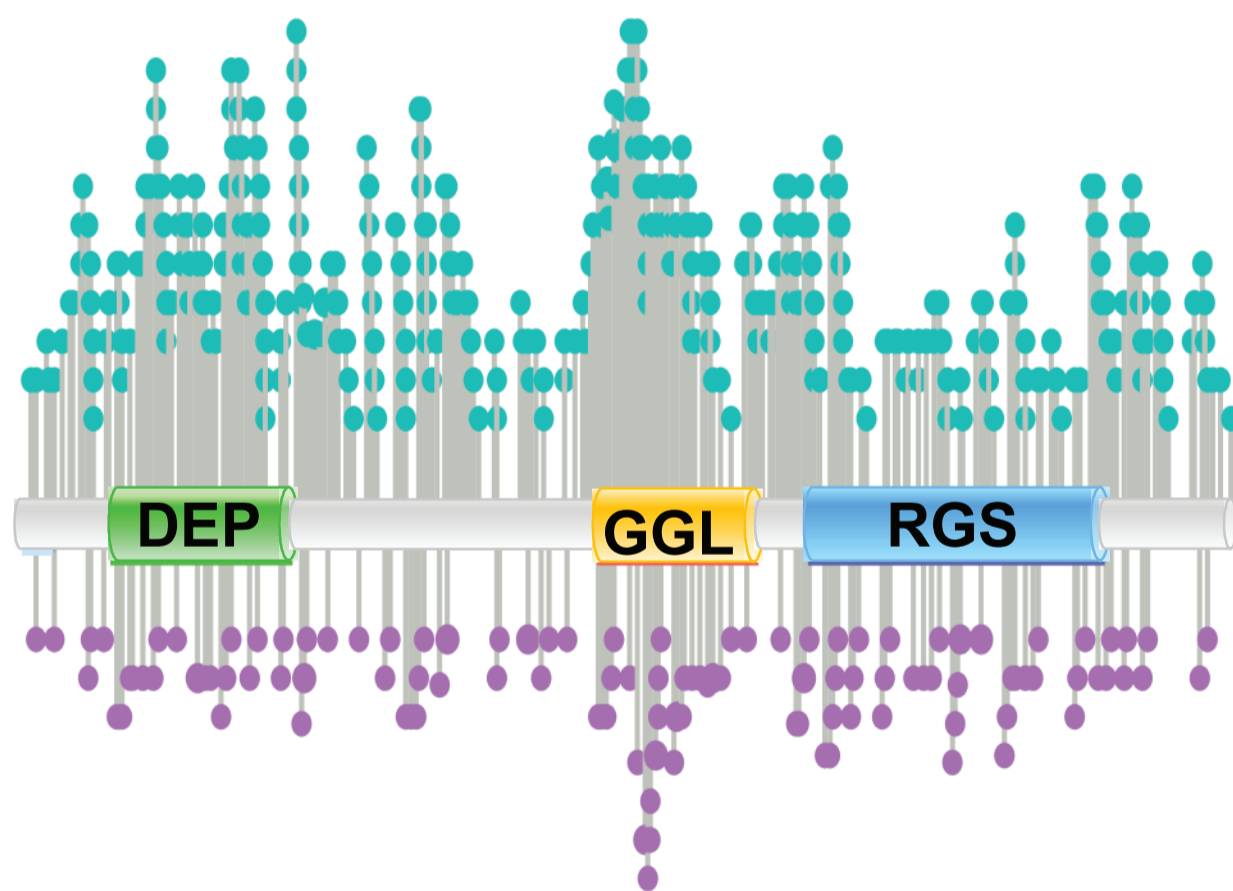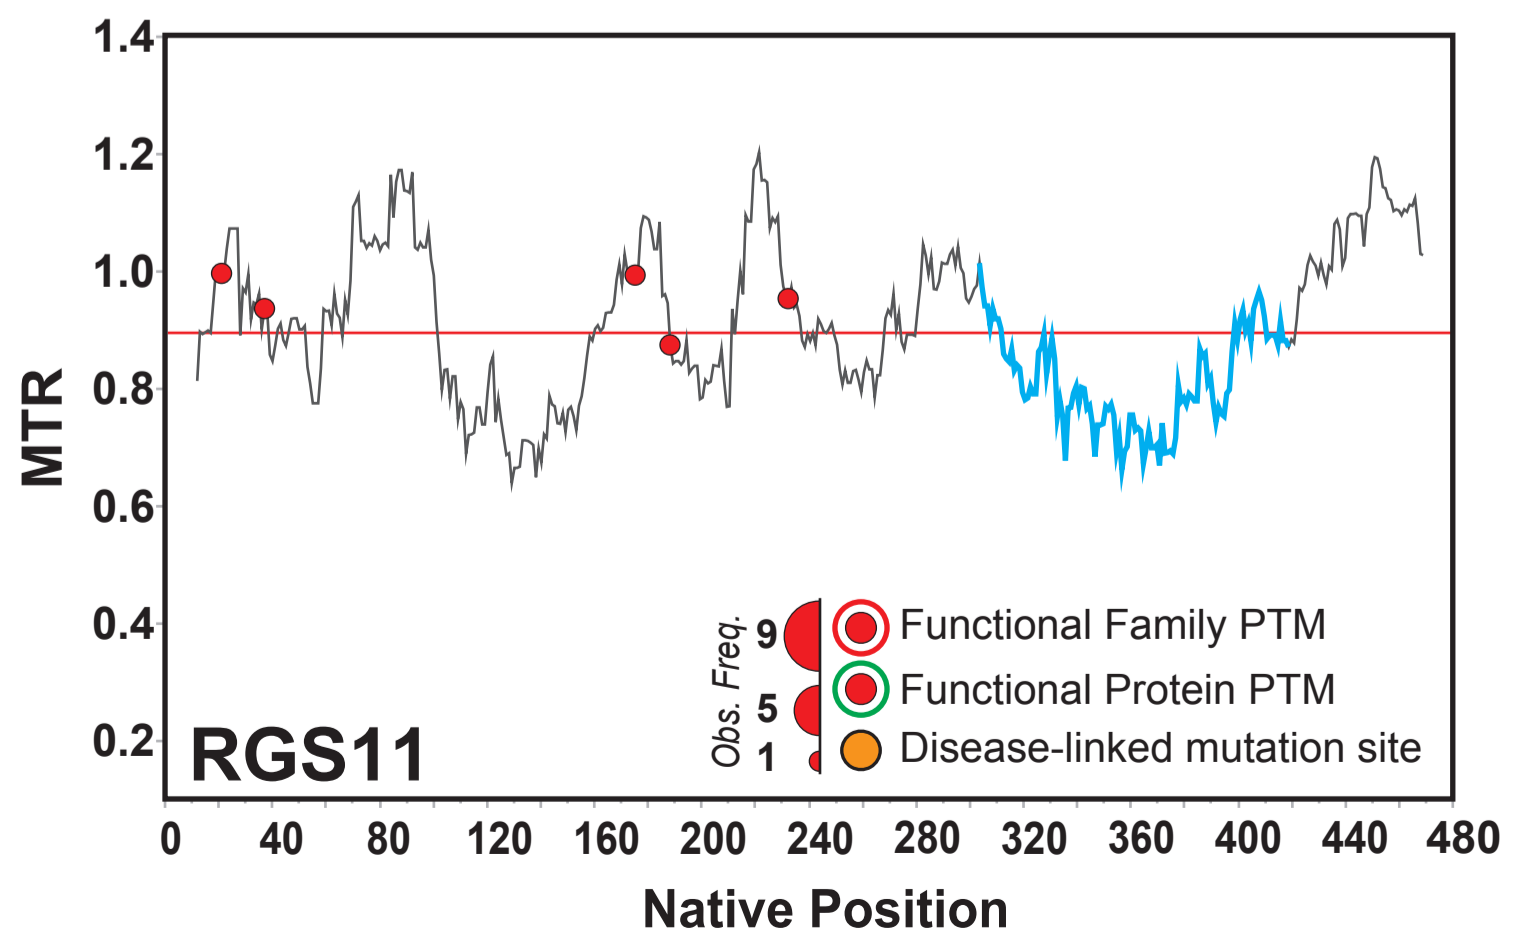

# RGS12

Missense

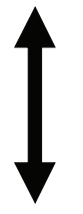

Silent

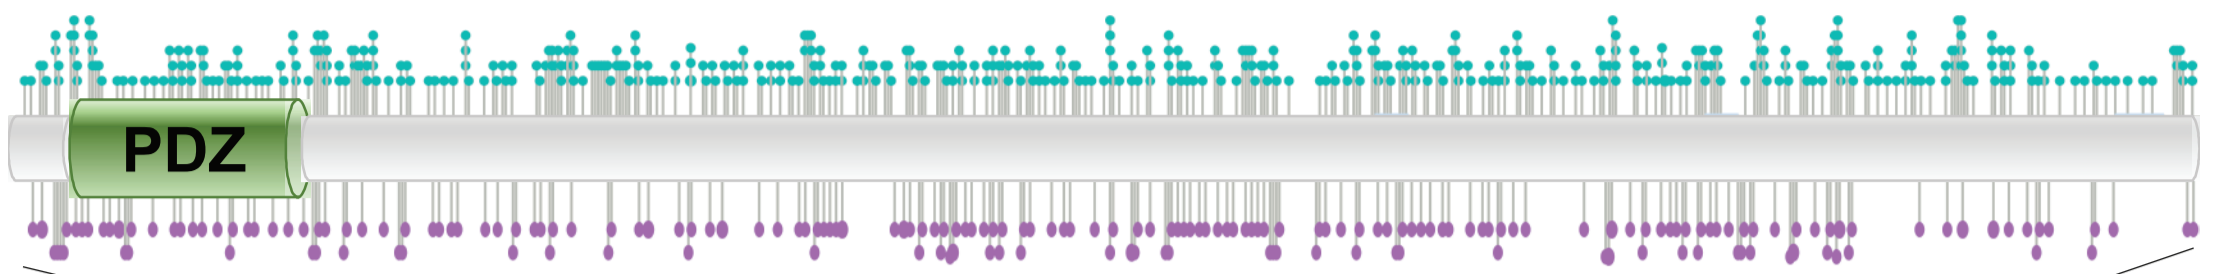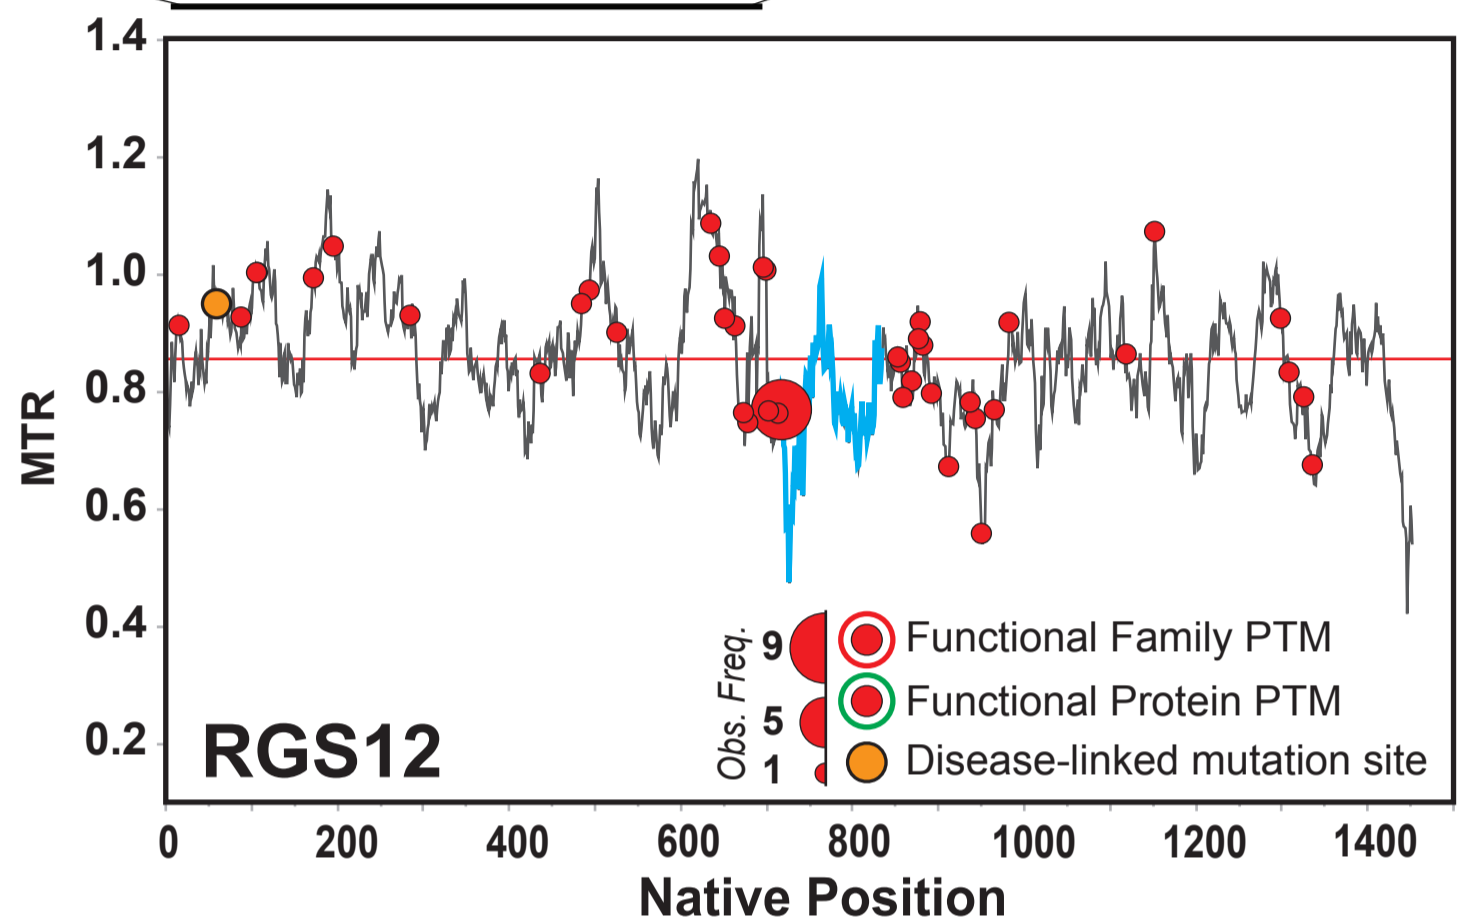

Missense

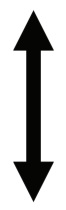

Silent

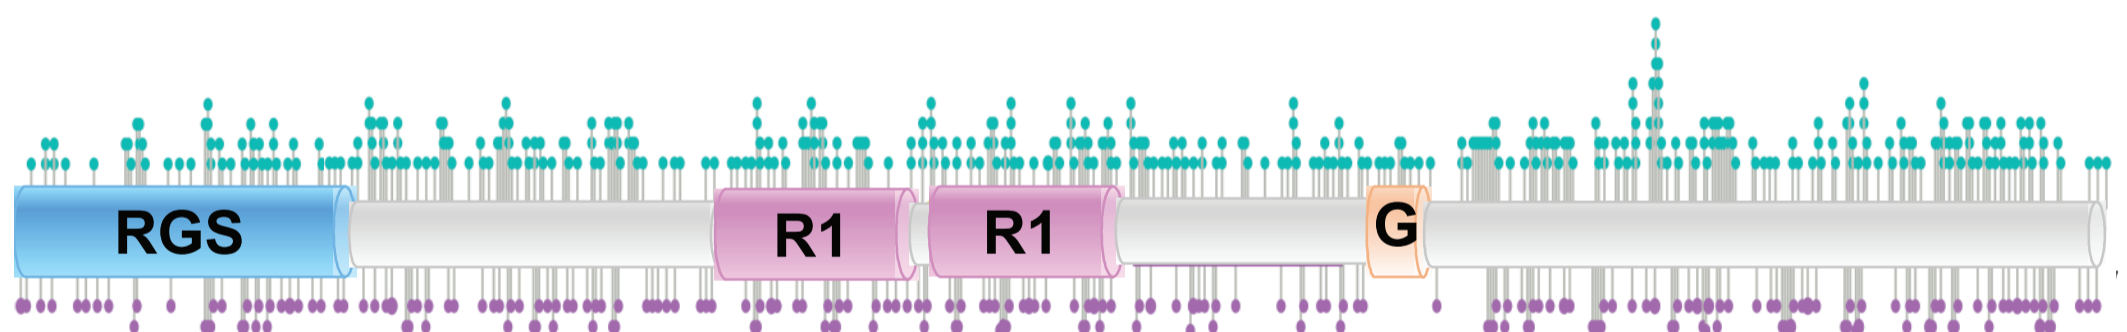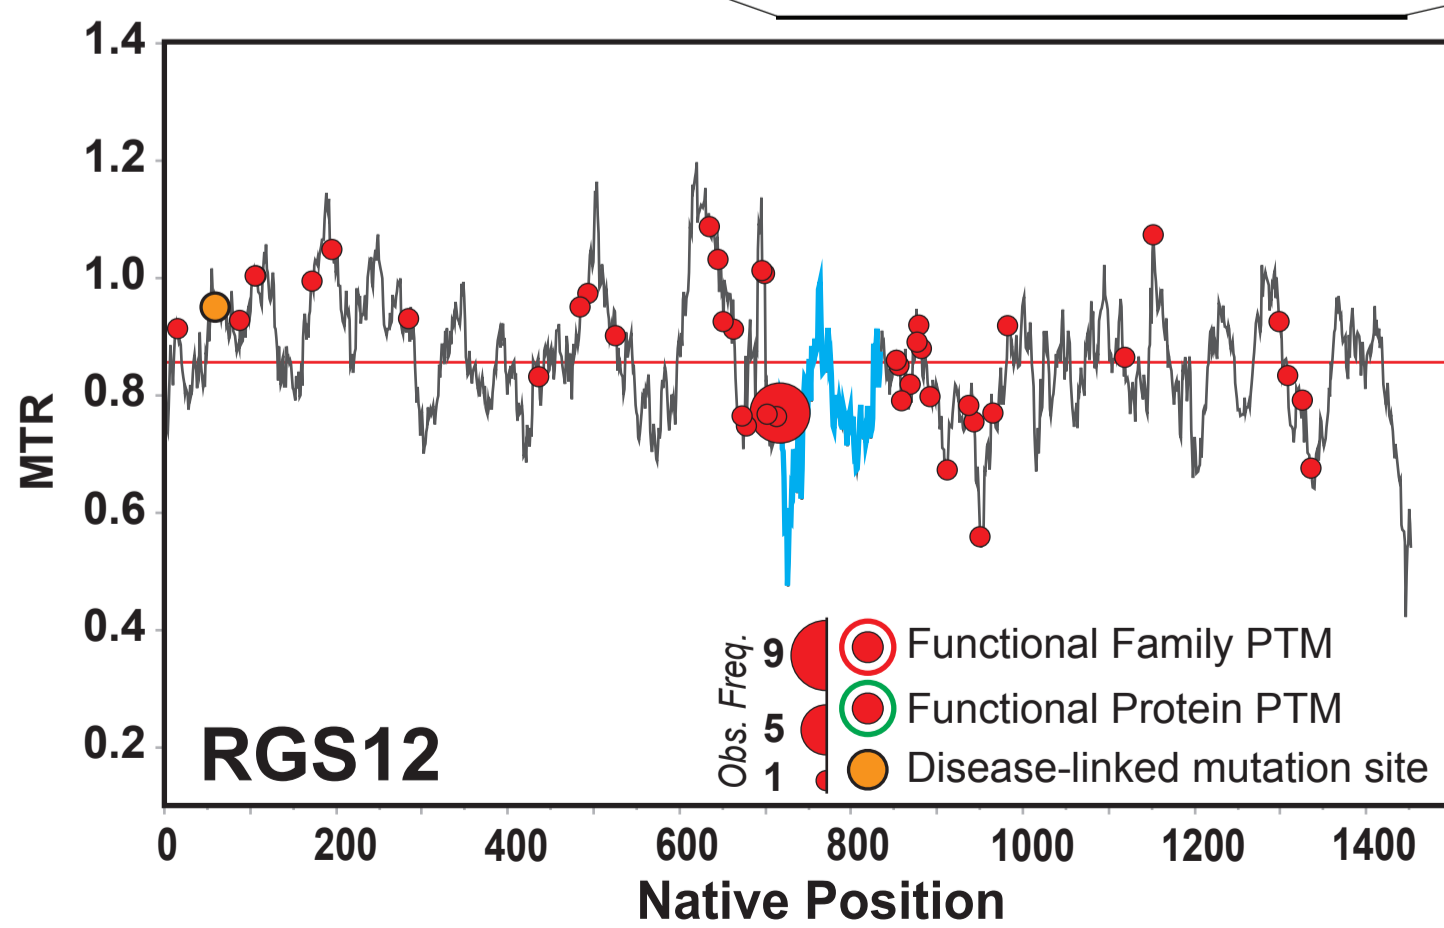

# RGS13

Missense

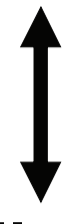

Silent

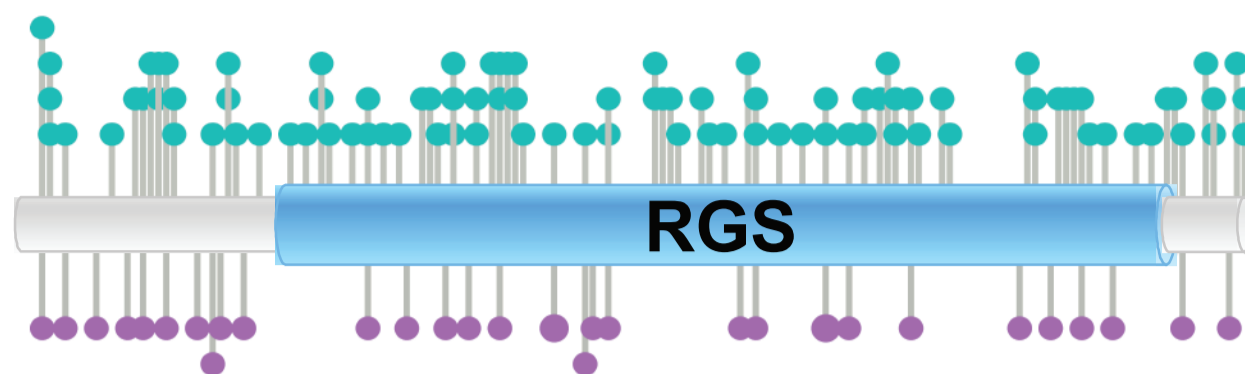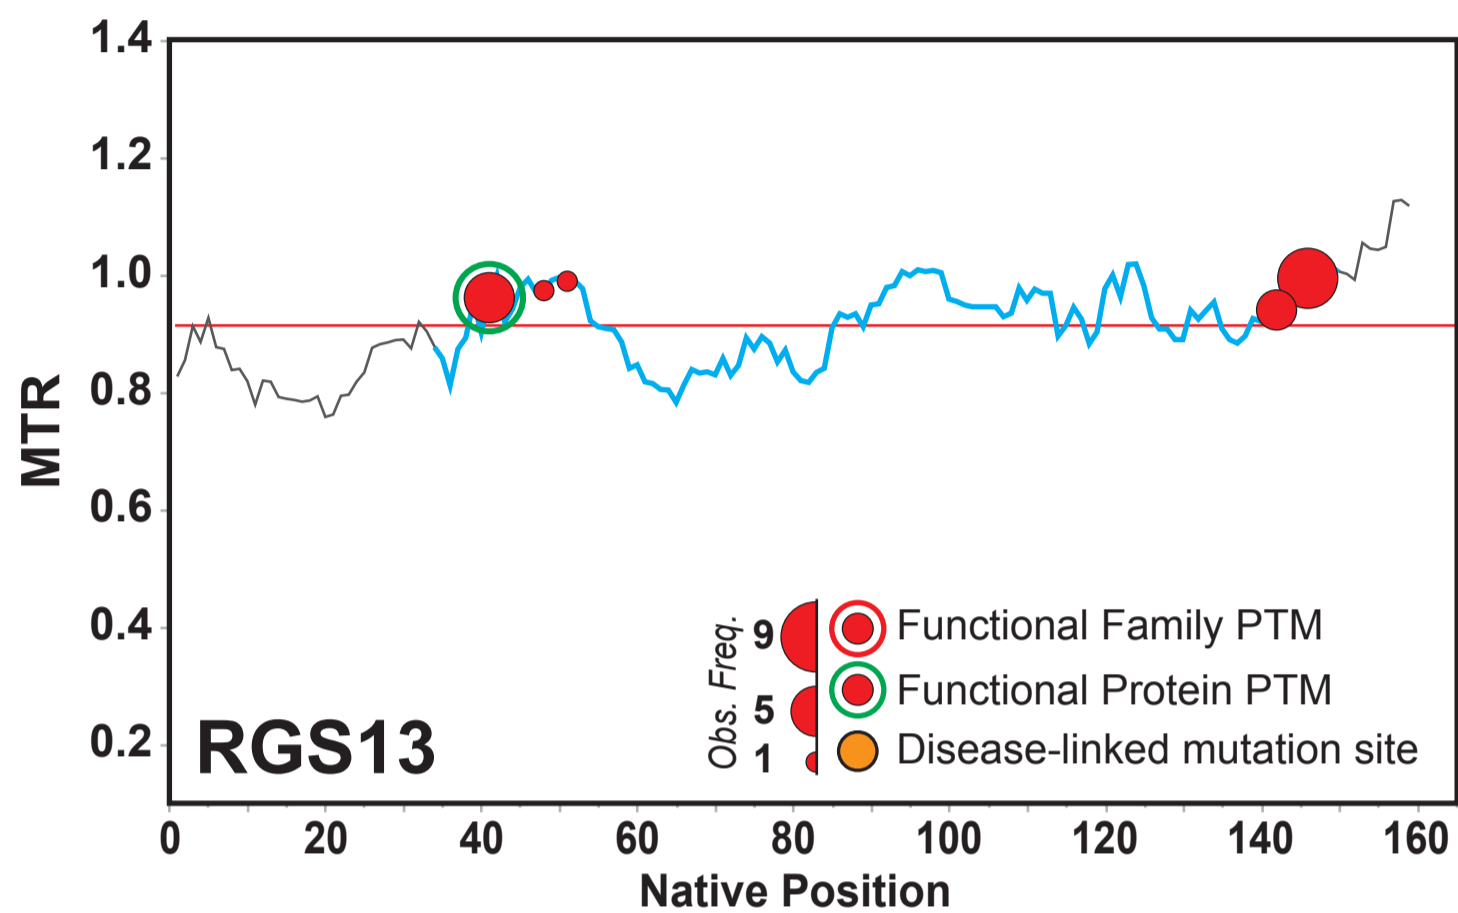

# RGS14

Missense

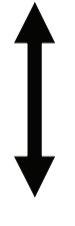

Silent

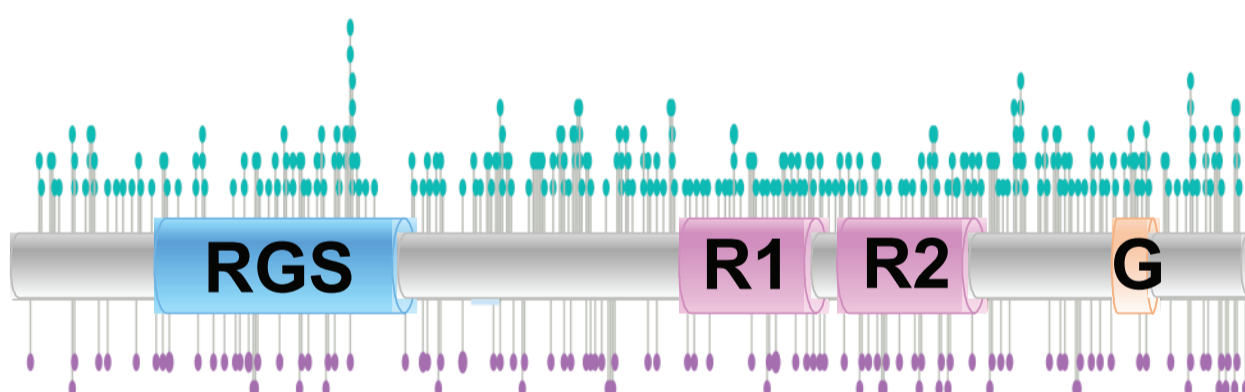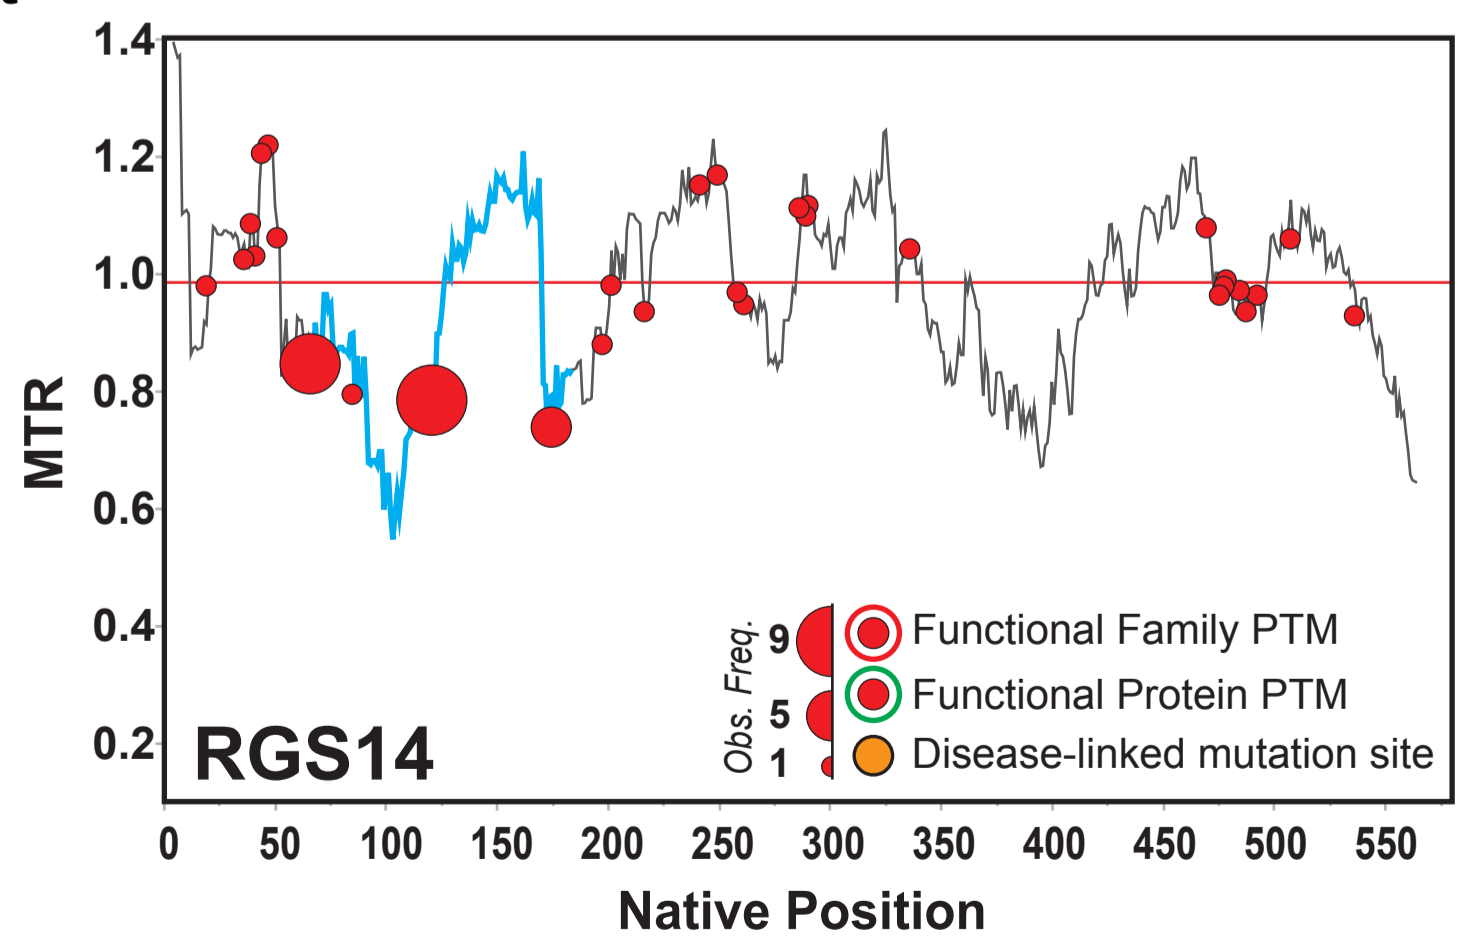

# RGS16

Missense  
↕  
Silent

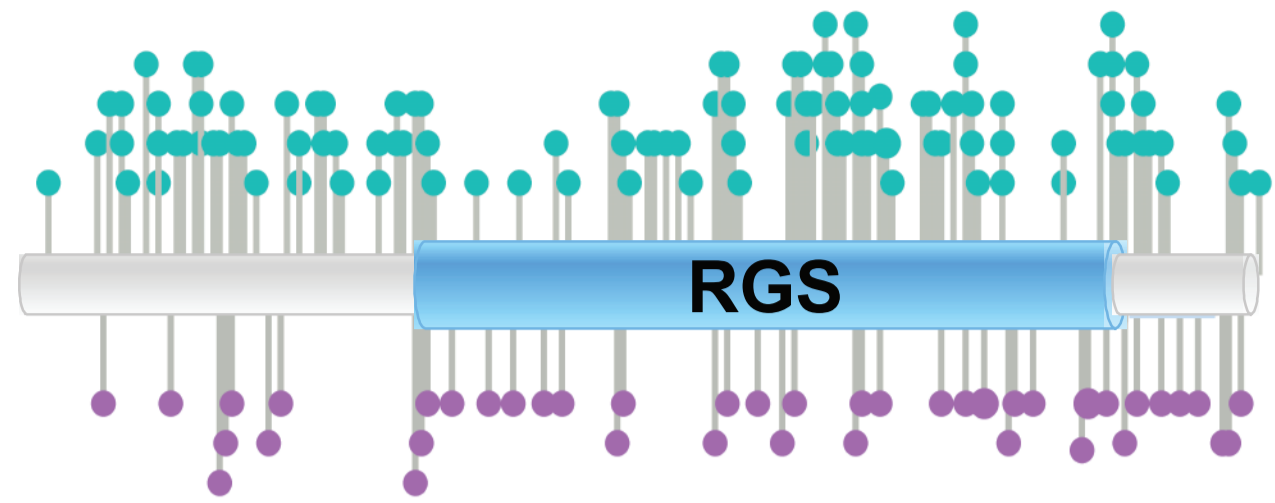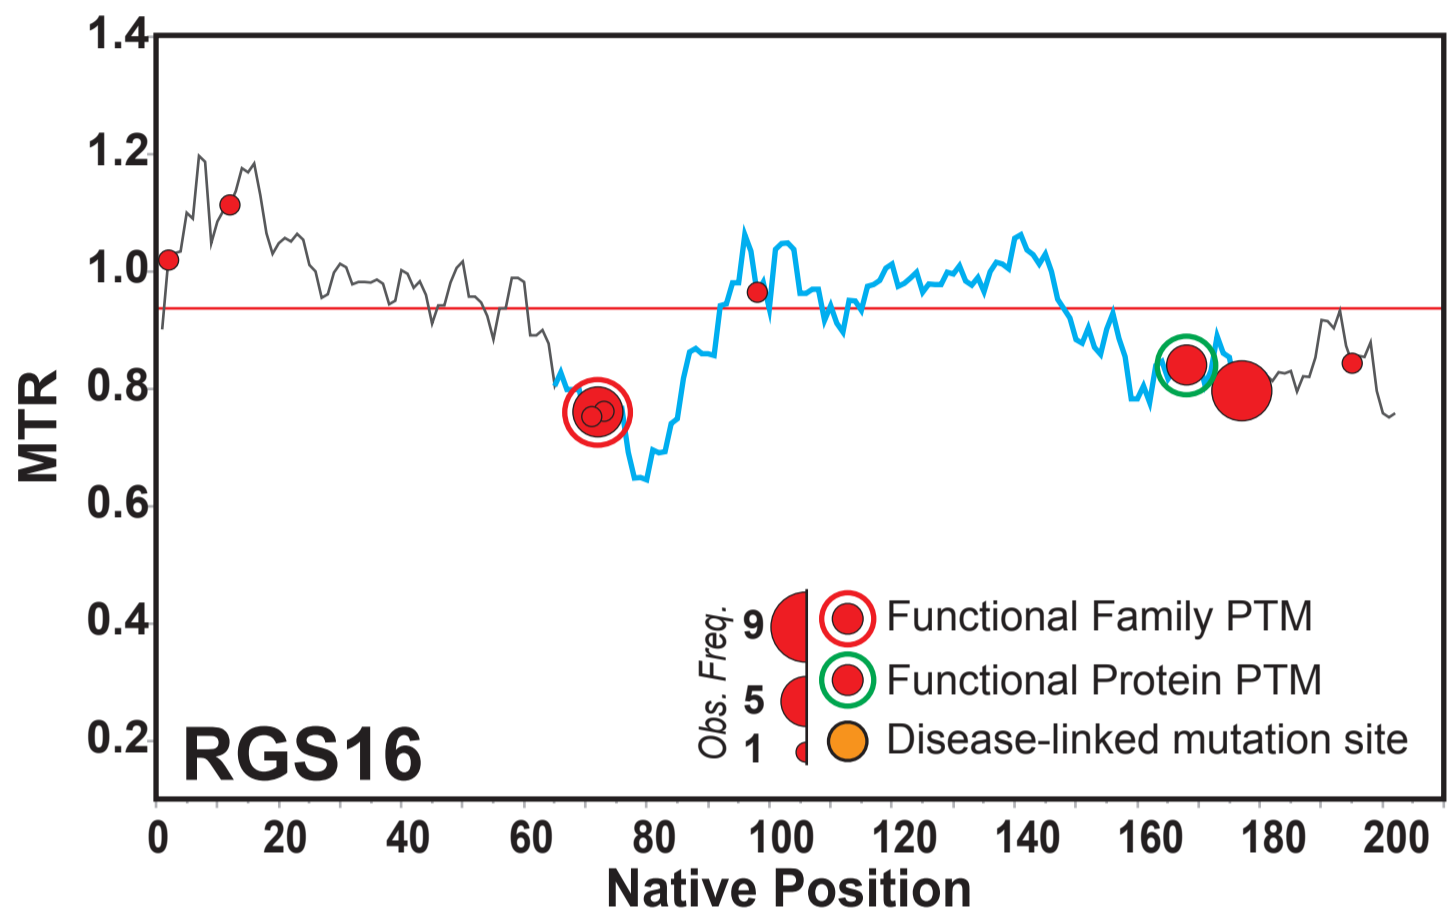

# RGS18

Missense  
↕  
Silent

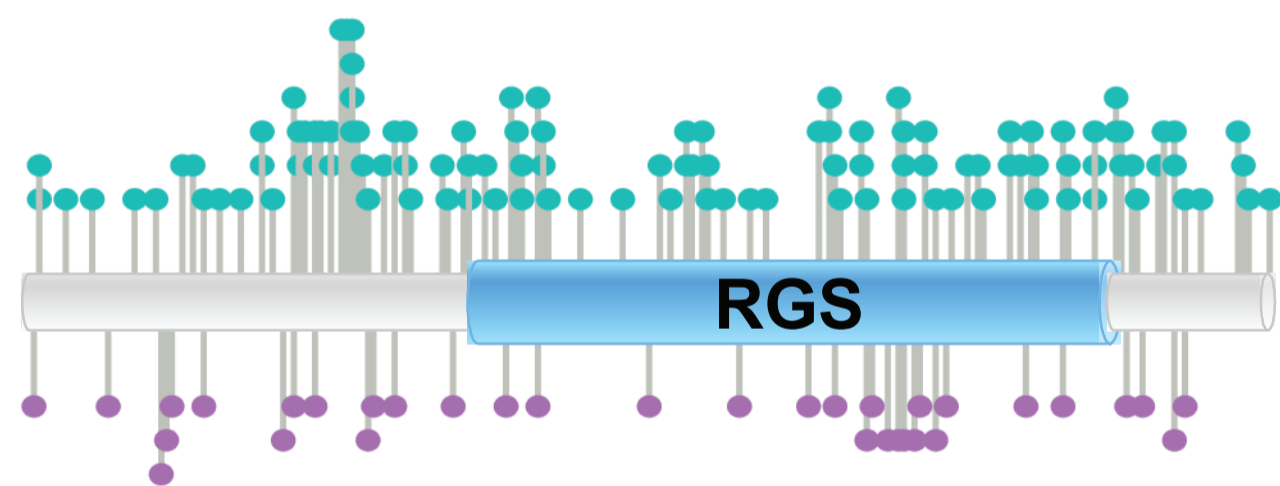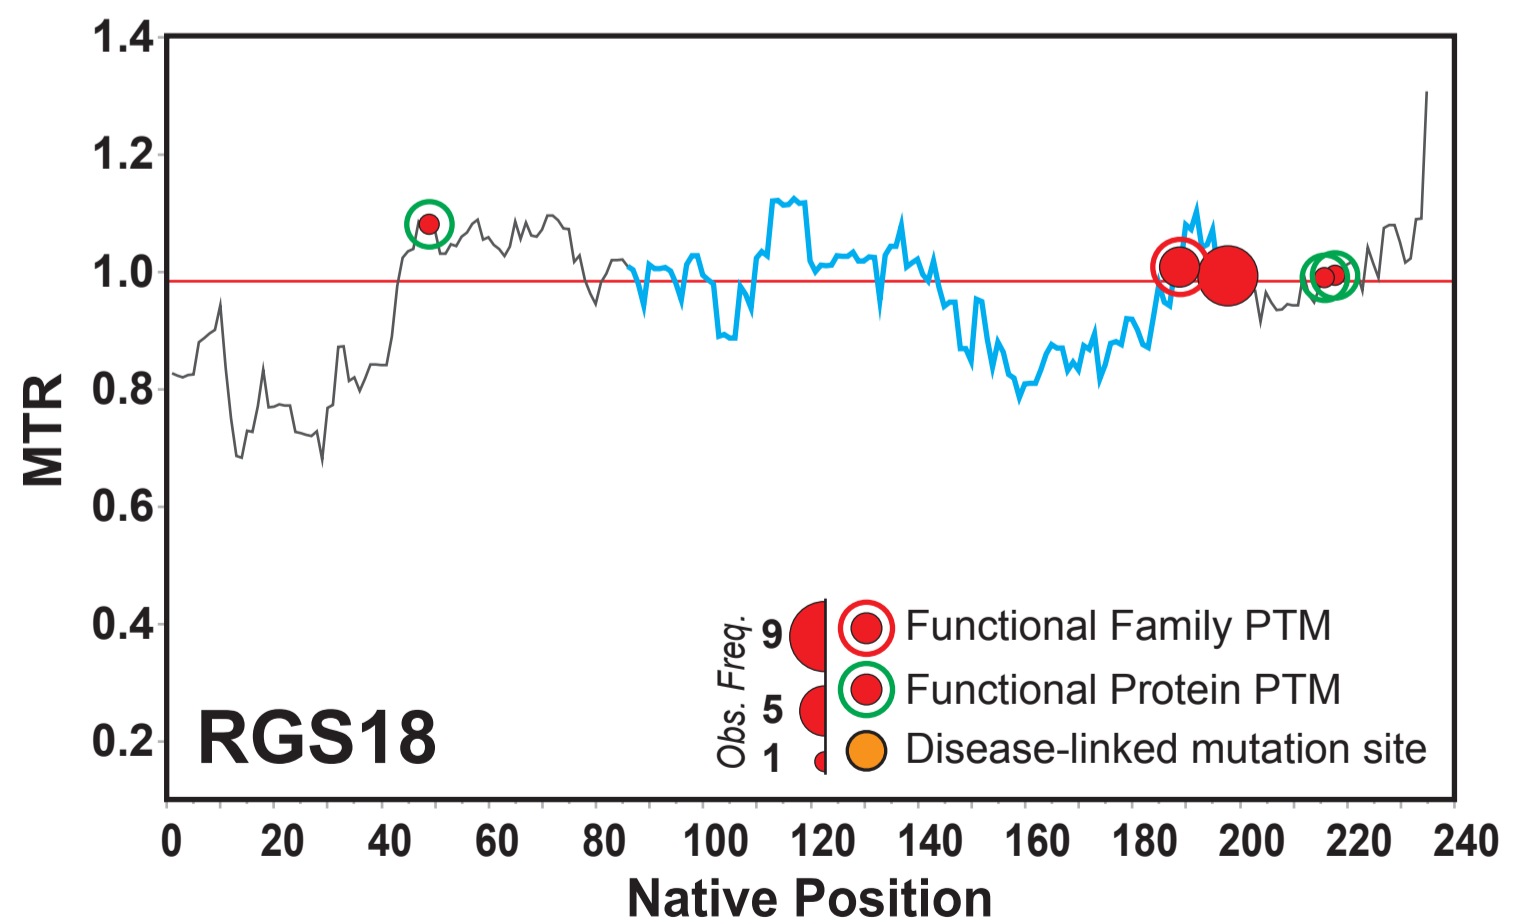

# RGS19

Missense

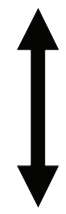

Silent

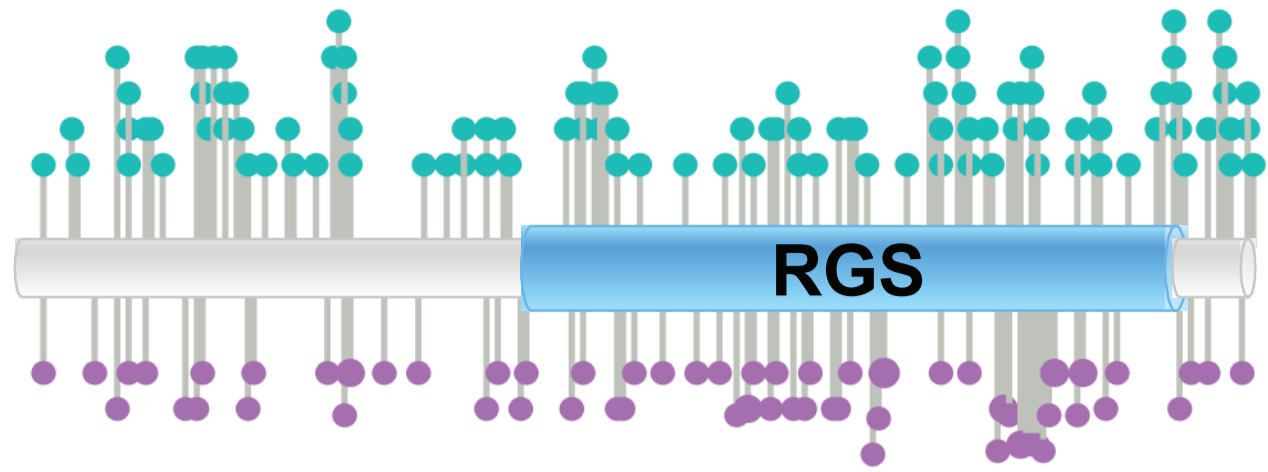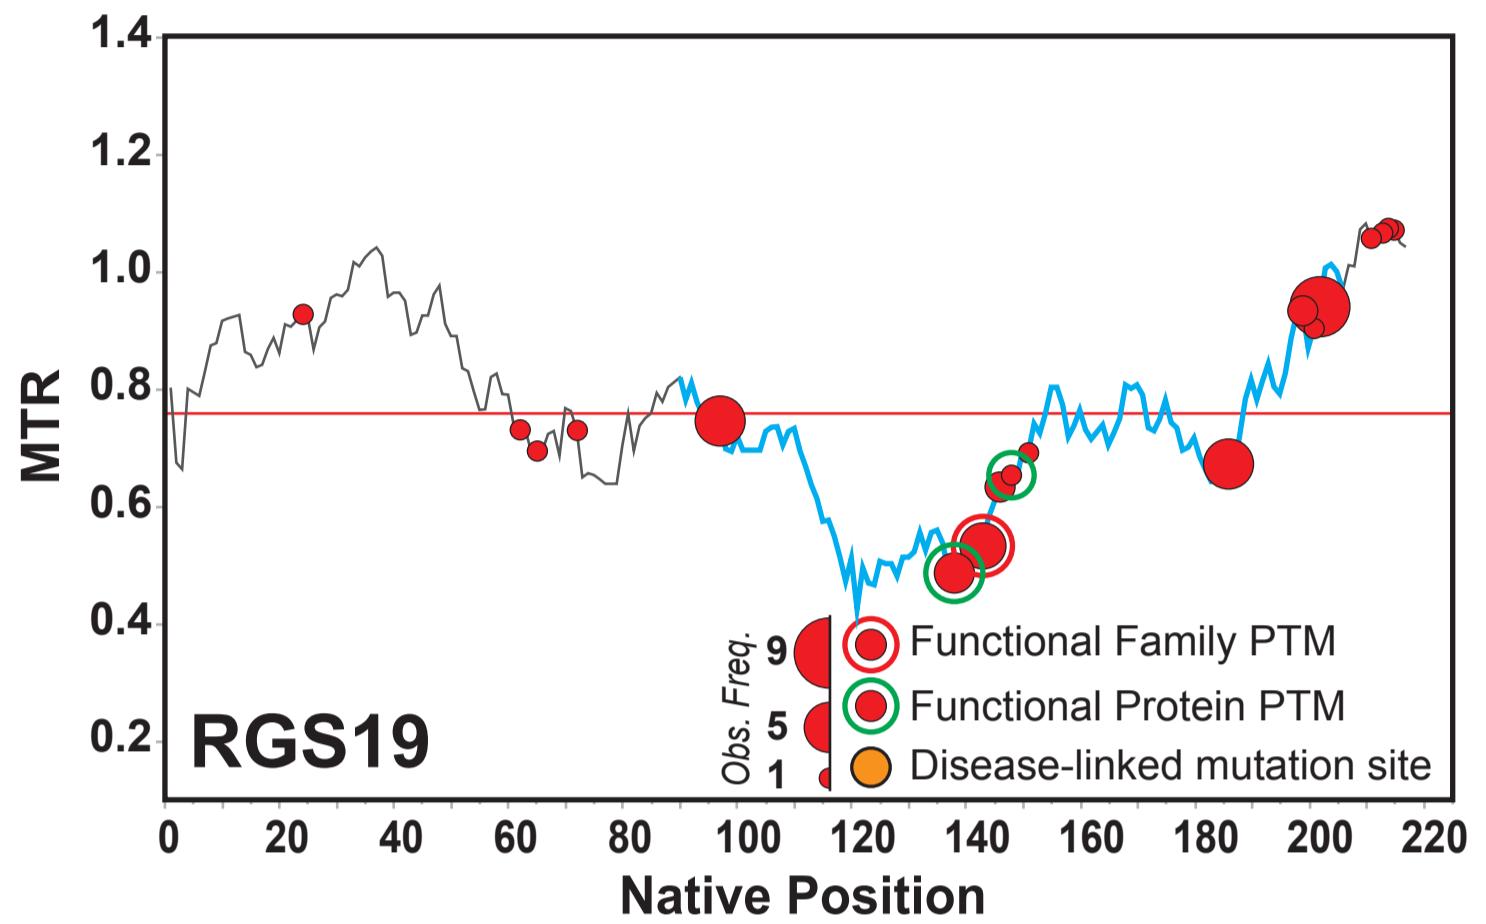

# RGS20

Missense

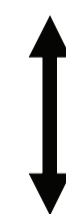

Silent

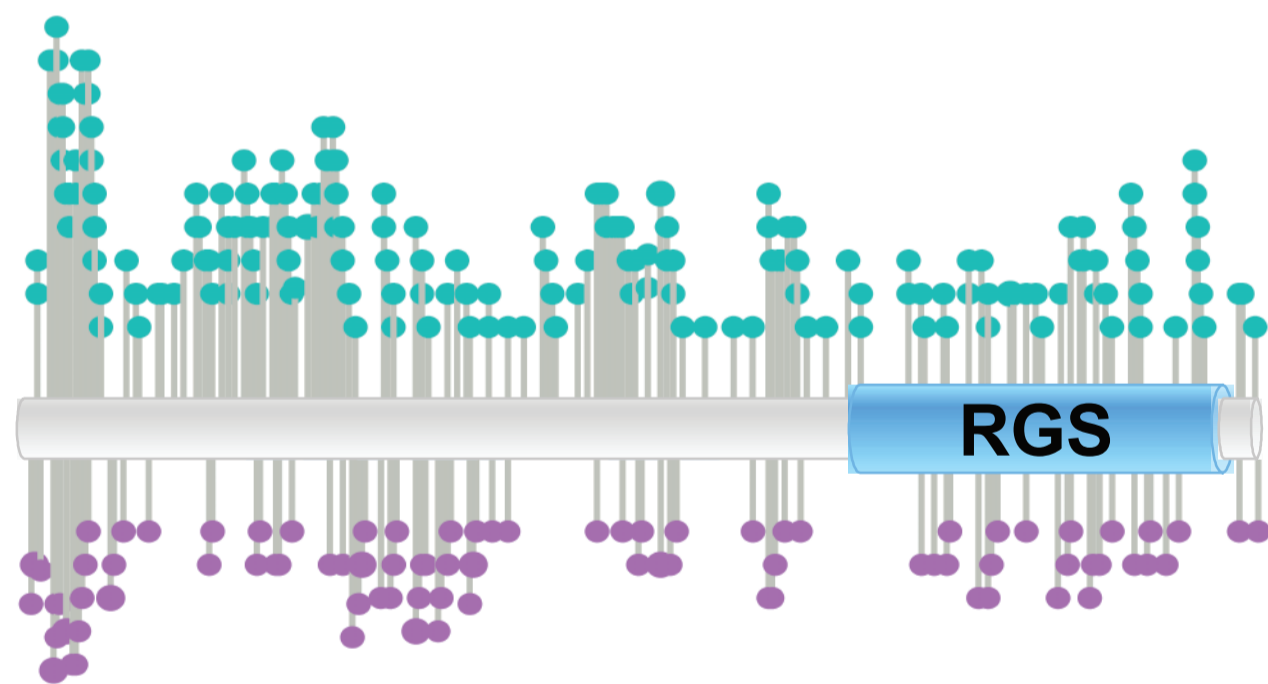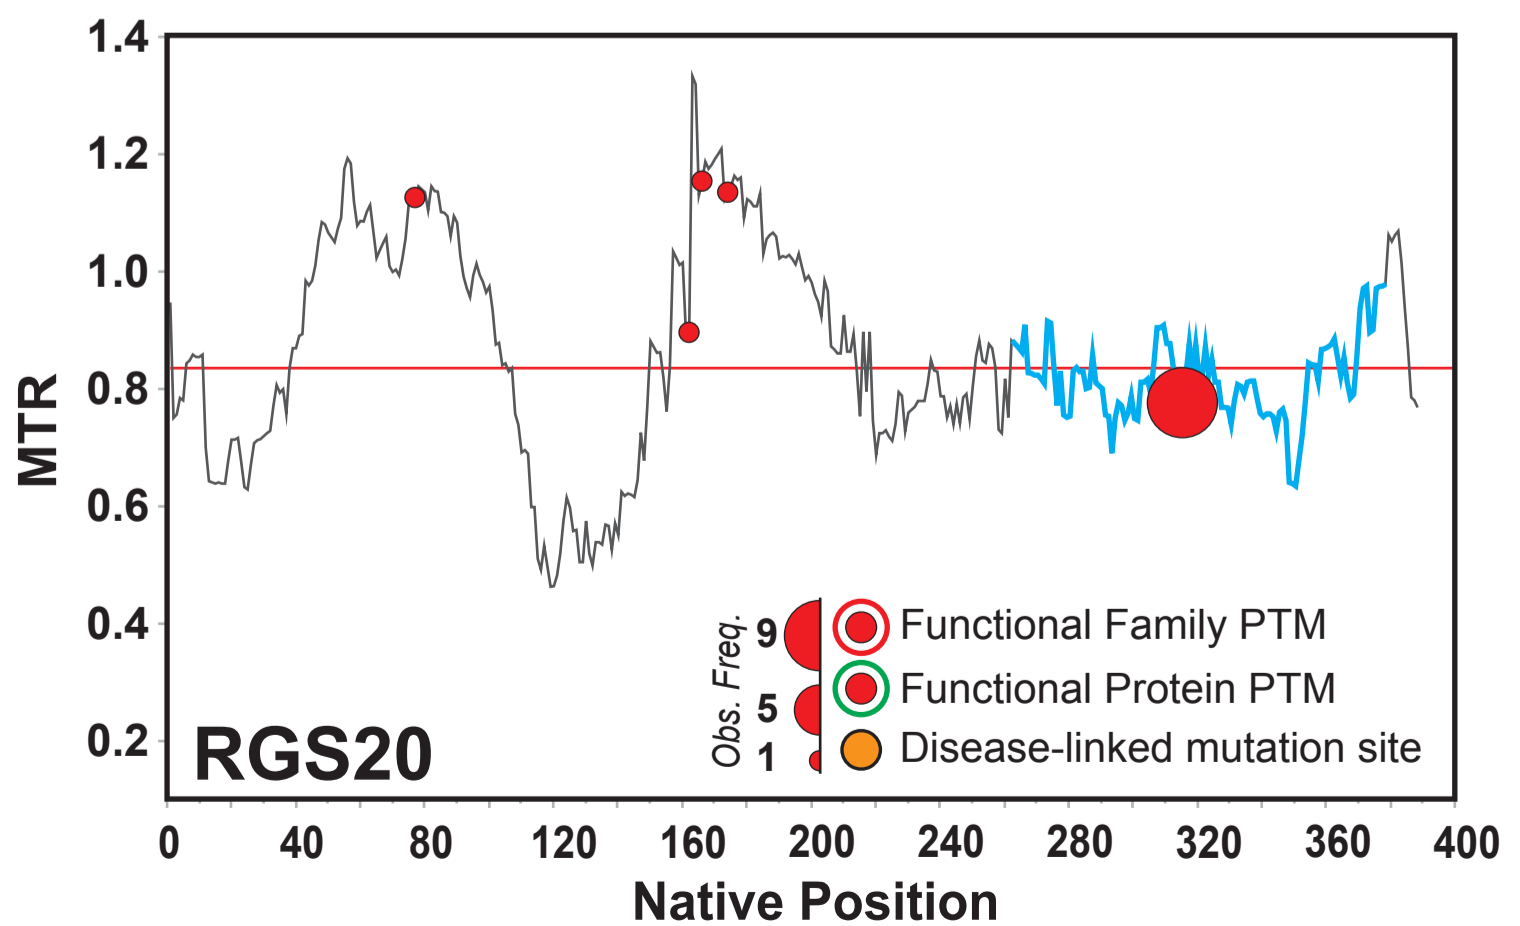



# RGS21

Missense

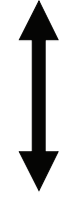

Silent

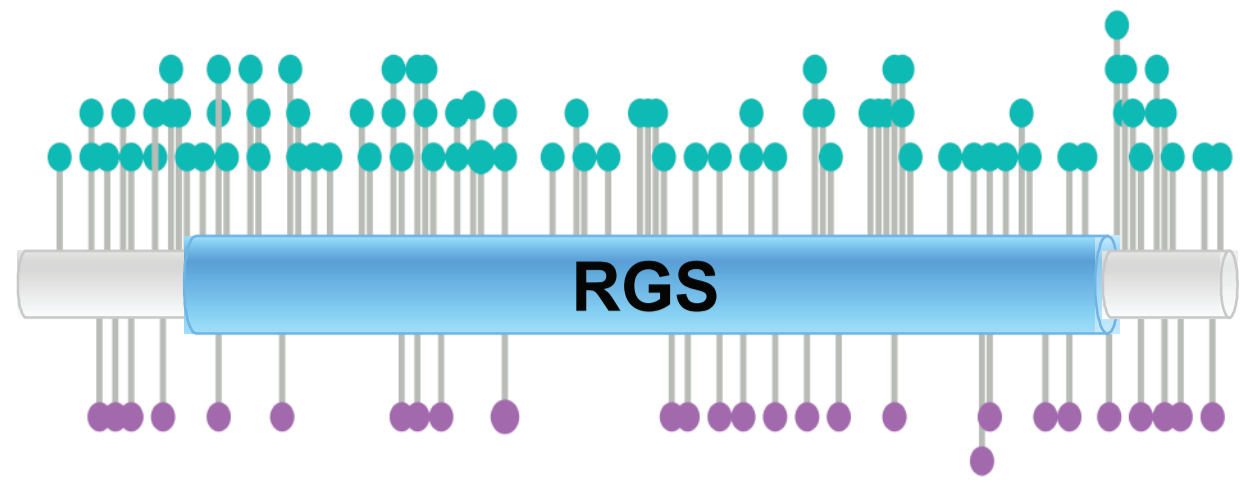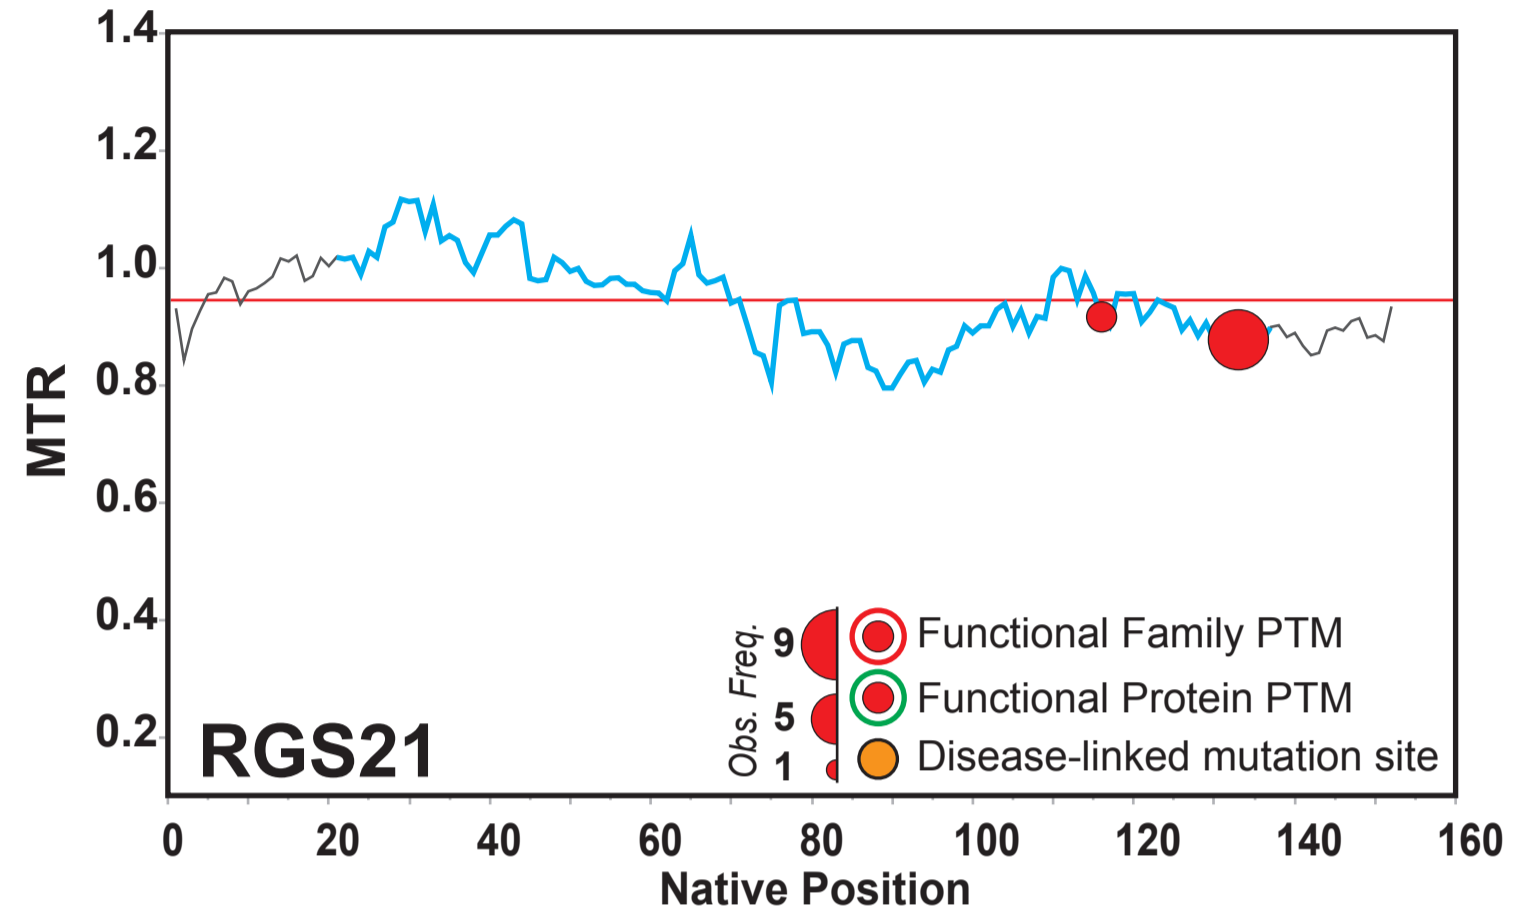

Supplement: 15354SupplData.pdf [file 15354SupplData.pdf]
